# Supplementary material for: A Scoping Review Evaluating the Current State of Gut Microbiota Research in Africa
Source: Microorganisms. 2023 Aug 20;11(8):2118. doi: 10.3390/microorganisms11082118 (PMC10458939; doi:10.3390/microorganisms11082118)
Supplement: Supplementary file 1 [file microorganisms-11-02118-s001.zip › Supplementary S1-Data extraction tool.xlsx]

## Sheet: Extracted data
Covidence #	Study Title	Author’s name & year of publication	Description of gut microbiota (results in terms of gut microbiota markers?)	Disease under study and whether it is of public health significance or not	Population description	Country of origin	Study setting (urban/city or rural)	Methods/ technologies used to analyze the gut microbiota	Study design/Types of studies	Sample size	Type of sample used	Age range	Gender ratio (Females/Males)	Ethnic group	Study aims &/or objectives	Interventions/Exposures	General key findings of the studies	Study funding Sources
1257	Lipid-based Nutrient Supplements Do Not Affect Gut Bifidobacterium Microbiota in Malawian Infants: A Randomized Trial	Aakko et al, 2017	Yes	No disease studied.	Children 5.50–6.50 months of age residing in Lungwena or Malindi, two rural Malawian communities.	Malawi	Rural	Quantitative real-time polymerase chain reaction (qPCR).	A Randomized Trial	160	Stool samples	5.50–6.50 months	86/74	Not indicated.	Aim: To assess how LNS, with milk or soy as the protein source, and corn-soy blend (CSB) (“likuni phala”) affects Bifidobacterium and Staphylococcus aureus microbiota composition in Malawian infants.	71 g/day of micronutrient-fortified CSB), 54 g/day of micronutrient-fortified LNS with milk protein base (milk-LNS), or 54 g/day of micronutrient-fortified LNS with soy protein base (soy-LNS).	The dietary supplementation did not have an effect on the Bifidobacterium and S aureus microbiota composition of the study infants. The fecal bifidobacterial diversity of the infants, however, changed toward a more adult-like microbiota profile within the observed time.	Not indicated.
1051	Alteration of the gut fecal microbiome in children living with HIV on antiretroviral therapy in Yaounde, Cameroon	Abange et al, 2021	Yes	HIV (human immunodeficiency virus). Disease is of public health significance.	Cameroonian children aged between 1 to 19 years.	Cameroon	Not indicated.	16S rRNA targeted sequencing	Case-control study	169	Stool samples	1-19 years	84/85	Ethnicity: Bamenda, Bamileke, Bamoun, Bassa, Beti, Eton, Ewondo, Haoussa and Maka.	Aim: To describe the gut microbiome composition of both HIV non-infected (unexposed) and HIV-infected children in Cameroon, and relate changes in microbiome structure and function to immune status, virological response and pediatric ART regimens.	None.	Cameroonian children harbored an intestinal microbiota characteristic of agrarian-associated lifestyles and displayed varying baseline compositions with respect to their ethnicity. HIV-infected, ART-treated children were characterized by decreased alpha diversity and shifts in community structure. ART regimen was associated with varying degrees of dysbiosis with PI/r based regimens presenting mor…	Cameroon government as well as an Early Career Scholar award from the University of Colorado, Denver Department of Medicine.
321	Impact of a Nomadic Pastoral Lifestyle on the Gut Microbiome in the Fulani Living in Nigeria	Afolayan et al, 2019	Yes	No specific disease was studied.	Nigerian Poupulationg consisting of 2 ethnic tribes: 1.Fulani tribe: They have a nomadic lifestyle and their diet includes foods gathered in the wild as well as produced by traditional farming. 2. Jarawa tribe: The majority of the Jarawa are agriculturalists (subsistence farmers) and traders, and consume farm produce rich in fiber. However, their dietary habits are gradually being influenced by u…	Nigeria	Both Semi- Urban (Fulani) and Nomadic (Jarawa)	Paired-end Illumina MiSeq sequencing	Comparative/ cross-sectional study	50	Stool samples	2 to 70 years	28/22	Black Africans	Aim: To investigate the phylogenetic diversity of the gut microbiota in a community of Fulani nomadic pastoralists, and their semi-urbanized neighbors – the Jarawa.	None.	In general, they observed large differences in the taxonomic and functional composition in the intestinal microbiota between the Fulani and the urban Jarawa population, supporting previous observations that diet and lifestyle are major factors influencing the composition of the gut microbiota.	This research was funded by the Austrian Agency for International Mobility and Cooperation in Education, Science, and Research (OEAD-GmbH); and Centre for International Cooperation and Mobility (ICM) with reference number ICM-2016-03232.
743	Study of the gut Microbiome Profile in Children with AutismSpectrum Disorder: a Single Tertiary Hospital Experience	Ahmed et al, 2020	Yes	Autism spectrum disorder (ASD). Not a disease of public health significance.	Egyptian children: children diagnosed with ASD as well as two contol groups; a non-autistic sibling group and an unrelated healthy group in good mental and physical health.	Egypt	Not disclosed.	SYBR Green Real-Time PCR	Observational study	131	Stool samples	2-18 years	53/78	Not disclosed.	Aim: To elucidate changes in gut microbiome in Egyptian autistic children and its possible correlation with the severity of autism and gastrointestinal (GI) symptoms.	None	The current study showed an evidence of changes in the gut microbiome of ASD children compared to the unrelated controls. However, the microbiome profile of siblings was more like that of autistic children than that of unrelated controls. This study also emphasizes the im-portance of identification of microbiome and specific microorganisms’ changes that can be targeted for diagnosis as well as fo…	Not disclosed.
75	Urogenital schistosomiasis is associated with signatures of microbiome dysbiosis in Nigerian adolescents	Ajibola et al, 2019	Yes	Urogenital schistosomiasis. Not a disease of public health significance.	Students from seven local villages in rural Nigeria who attend Gotomo Primary School. 24 individuals infected with S. haematobium and 25 controls.	Nigeria	Rural	16S rRNA Sequencing/ Illumina MiSeq platform	Observational study	49	Stool samples	11–15 years	Not indicated. However, most samples were from male students.	Not indicated	Aim: To investigate the impact of S. haematobium infection on the intestinal microbiome of adolescents aged 11–15 years in the Argungu Local Government Area of Kebbi State, Nigeria.	None	In general, the authors have found that the adolescent gut microbiome may be shifted towards a dysbiotic state by infection with S. haematobium, with some similarities to prior observations of the gut microbiota in inflammatory contexts. Such a broad dysbiosis would be an interesting observation in urogenital schistosomiasis, building on the increased abundance of Prevotella OTUs associated with …	The National Institute of Allergy and Infectious Diseases, the Bill and Melinda Gates Foundation, and the National Institute of General Medical Science (COBRE Center for Computational Biology of Human Disease and the COBRE Center for Antimicrobial Resistance and Therapeutic Discovery, awarded to PB).
48	Gut microbiome of Moroccan colorectal cancer patients	Allali et al, 2018	Yes	Colorectal cancer (CRC). It is a disease of public health significance.	Moroccan colorectal cancer patients and healthy individuals. The Individuals are from the Oriental region and from Casablanca.	Morocco	Not indicated	16S rRNA amplicon sequencing	Comparative study	23	Stool samples	20-79	18/5	Not indicated	Aim: The aim of the study was to compare the stool microbiome of Moroccan cancer patients with healthy individuals.	None.	CRC stools were markedly different from controls, showing an overrepresentation of 33 genera.	This work was supported by a Grant from the NIH for H3ABioNet/H3Africa to H.G
40	Alterations of Gut Microbiota in Type 2 Diabetes Individuals andthe Confounding Effect of Antidiabetic Agents	Almugadam et al, 2020	Yes	Type 2 Diabetes Mellitus (T2DM). It is a disease of public helath significance.	24 type 2 diabetes (metformin, glimepiride, and nontherapeutic subgroups;N=8) and 24 healthy control subjects, at Namuzaji Center of NationalHealth Insurance Fund, Kosti, White Nile State, Sudan.	Sudan	Not disclosed	Bacterial 16S rRNA Gene Sequencing	Case-control	48	Stool samples	Not indicated.	24/24	Not indicated	Aim: To investigate the intestinal microbiota among healthy and type 2 diabetes individuals and explore the effect of antidiabetic agents on gut bacterial flora.	The diabetic group was further categorized into three clusters (N=8): metformin (MET), glimepiride (GLIM), and nontherapeutic (NT) subgroups	Numerous alterations were observed in the gut microbial community of diabetic individuals. These changes were characterized by a significant lowered abundance of Faecalibacterium, Fusobacterium, Dialister, and Elusimicrobium in the nontherapeutic T2DM subgroup compared to the healthy control group. Likewise, correlation analysis showed a substantial decline in gut microbiota richness and diversit…	This work supported by the National Natural Science Foundation of China
971	Gut Bacteria Missing in Severe Acute Malnutrition, Can We Identify Potential Probiotics by Culturomics?	Alou et al, 2017	Yes	Severe Acute Malnutrition. Not a disease of public health significance.	Ten severely undernourished children with nutritional oedema (kwashiorkor) and five healthy children without any criteria of malnutrition in Senegal and Niger.	Senegal and Niger	Not indicated.	16S rRNA gene-targeted metagenomics	Case-control study	15	Stool samples	Not indicated.	6/5, and 4 children with unknown gender.	Not indicated.	Objective: The objective of this study was to identify potential bacteria which met these criteria, were present in healthy children and deficient in children with severe acute malnutrition.	None.	The authors found a globally decreased diversity, a decrease in the hitherto unknown diversity (new species isolation), a depletion in oxygen-sensitive prokaryotes including Methanobrevibacter smithii and an enrichment in potentially pathogenic Proteobacteria, Fusobacteria and Streptococcus gallolyticus. A complex of 12 species identified only in healthy children using culturomics and metagenomic…	This work was funded by the Mediterranée Infection Foundation.
345	Gut microbiome alterations in patients with stage 4 hepatitis C	Aly et al, 2016	Yes	Hepatitis C Virus (HCV). Disease of public health significance.	Six HCV patients and eight healthy individuals , from the city of Beni Suef in Egypt	Egypt	City	16S rRNA gene sequencing/ Illumina MiSeq	Prospective case-control study	14	Stool samples	21-65	All males	Not disclosed	Aim: To explore the composition of the gut microbiomes of HCV patients at Beni-Suef Emergency Hospital, (Beni-Suef, Egypt) in comparison to healthy individuals from the same city.	None.	Overall, the alpha‑diversity of the healthy persons’ gut microbiomes was higher than those of the HCV patients. Patients with HCV had a few significant fecal microbiome changes that may be related to liver-controlled homeostasis, protein synthesis, lipid digestion, or possibly to bacterial translocation, immune modulation, or a combination of all of the above mechanisms.	No funding
3106	Profile of microbiota is associated with early onset of colorectal cancer in Egyptian and Kenyan patients	Arafat, 2020	Yes	Colorectal cancer. Disease is of public health significance.	8 healthy individuals and samples from 20 Egyptian CRC patients and 20 Kenya.	Egypt and Kenya	Not indicated.	16S rRNA amplicon sequencing	Retrospective convenience sample design	48	Colonic mucosal sample	Not indicated.	Not indicated.	Not indicated.	Aim/Objective: To assess the colonic microbiota and the expression of specific host response genes in normal colonic mucosal samples from healthy individuals and from Egyptian Kenyan CRC patients.	None.	The findings suggest that the oncoprotective effect of Mitsuokella multacida should be further investigated.	The study is supported by the US-Egypt STDF grants (NAS2000007148 and 144/17) and the Impact funds of University of Alabama at Birmingham.
978	Child development, growth and microbiota: follow-up of a randomized education trial in Uganda	Atukunda et al, 2019	Yes	No disease studied.	One hundred and fifty-five mother-child pairs who were included at 20-24 months in the Kisoro and Kabale districts of South-Western Uganda.	Uganda	Rural	16S rRNA amplicon sequencing	Follow-up study of a two-armed, open cluster-randomized education intervention.	155	Stool samples	Mothers: Not indicated. Children: 20-24 months	Children: 70/85	Not indicated.	Aim: To examine development, growth and gut microbiota composition among a subsample of children at the age of 36 months.	Maternal Education	The maternal education intervention had positive effects on child development and growth at three years, but did not alter gut microbiota composition. This intervention may be applicable in other low-resource settings.	The study was supported by the Throne Holst Foundation, the University of Oslo and TNO’s Early Research Program “Personalized Health”.
969	Infant and Adult Gut Microbiome and Metabolome in Rural Bassa and Urban Settlers from Nigeria	Ayeni et al, 2018	Yes	No disease studied.	Rural Bassa and urbanized individuals from Nigeria, including infants.	Nigeria	Rural and Urban.	16S rRNA gene sequencing/ Illumina MiSeq platform	Cross-sectional study	48	Stool samples	<3- 75 years	Not indicated.	Ethnicity: Bassa, Hausas, Igbos, Yorubas and Ebira.	Aim: To characterize the fecal microbiota and metabolome of two Nigerian communities, the Bassa rural agriculturalists and urban individuals from four state capitals (Ilorin, Abeokuta, Ado Ekiti, and Ibadan) and the Nigerian capital city (Abuja), which also include infants aged <3 years.	No intervention.	Their data highlight specific microbiome traits that are progressively lost with urbanization, such as the dominance of pristine fiber degraders and the low inter-individual variation. The high degree of microbial dispersal observed in the Bassa meta-community nullifies the differences between infant and adult intestinal ecosystems, suggesting that the infant-type microbiome in Western population…	Society for Applied Microbiology/International Capacity Building Award.
87	Randomized Open-Label Pilot Study of the Influence of Probiotics and the Gut Microbiome on Toxic Metal Levels in TanzanianPregnant Women and School Children	Bisanz et al, 2014	Yes	No disease studied.	Two populations were recruited in the Mwanza region, Tanzania for this study: (i) 44 school-aged children aged 6 to 10 years (referred to as SAC) and (ii) a subset of 60 pregnant womenin their first trimester who were being recruited for a separate study on nutrition and the microbiome (referred to as PW).	Tanzania	City	16S rRNA sequencing via the Ion Torrent platform	Randomized Open-Label Pilot Study	104 (However, the number decreased at some point of the study as some participants were lost to follow-up).	Stool samples	6-40 years	Overal ratio in both SAC and PW Group: 70/12	Not disclosed	Aims: To determine the blood metal levels in the local population and frompotential fish sources, (ii) to measure if consumption of a probiotic yogurt had an effect on blood metal levels, and (iii) to characterize the gut microbiome of children to determine if there arebacterial genera associated with these metal levels.	Probiotic supplement/Probiotic yogurt and Toxic metals	Administration of the probiotic was not observed to have an effect on the gut bacterial community composition. Elevated blood lead was associated with increases in Succinivibrionaceae and Gammaproteobacteria relative abundance levels in stool.	Funding was received from the Bill and Melinda Gates Foundation
515	Microbiota at Multiple Body Sites during Pregnancy in a Rural Tanzanian Population and Effects of Moringa-Supplemented ProbioticYogurt	Bisanz et al, 2015	Yes	No disease studied.	Women who were attending the antenatal clinic at Nyerere Dispensaryin Buswelu, district of Ilemela, Mwanza Region, Tanzania.	Tanzania	Rural	16S rRNA gene sequencing/ Illumina MiSeq platform.	Open-labelstudy design	56	Stool samples	18-40	All females	Not disclosed	Aim: To assess the influence of probiotic yogurt containing Lactobacillus rhamnosus GR-1, supplemented with Moringa plant as a source of micronutrients, on the health and oral, gut, vaginal, and milk microbiotas of 56 pregnant women in Tanzania.	Moringa-Supplemented Probiotic Yogurt	Microbiota analysis by weighted UniFrac distances comparing samples to enrolment show that Moringa-supplemented probiotic yogurt does not affect the microbiota structure and that the faecal microbiotas remain stable over pregnancy. However, daily micronutrient-supplemented probiotic yogurt provides a safe, affordable food for preg-nant women in rural Tanzania, and the resultant improvement in the…	Funding was received from the Bill and Melinda Gates Foundation
972	Cotrimoxazole reduces systemic inflammation in HIV infection by altering the gut microbiome and immune activation	Bourke et al, 2019	Yes	HIV (human immunodeficiency virus). Disease is of public health significance.	HIV-positive Ugandan and Zimbabwean children.	Uganda and Zimbabwe	Not indicated.	Whole metagenome shotgun sequencing	Experimental/longitudinal study	140	Stool samples	Not indicated.	Not indicated.	Not indicated.	Aim: To investigate the impact of cotrimoxazole on systemic inflammation, an independent driver of HIV mortality, and to explore the impact of cotrimoxazole on the gut microbiome.	Cotrimoxazole	Together, these data demonstrate that cotrimoxazole reduces systemic and intestinal inflammation both indirectly via antibiotic effects on the microbiome, and directly by blunting immune and epithelial cell activation. Synergy between these pathways may explain the clinical benefits of cotrimoxazole despite high antimicrobial resistance, providing further rationale for extending coverage among pe…	This study was supported by the Wellcome Trust, co-funded by The Royal Society; Canadian Institutes of Health Research; Medical Research Council; Department for International Development under MRC/DFID Concordat agreement and EDCTP2 programme supported by the European Union; MRC Clinical Trials Unit at UCL.
998	The gut microbiome in konzo	Bramble et al, 2021	Yes	Konzo. Not a disease of public health significance.	180 individuals in the Democratic Republic of the Congo; 30 from Kinshasa, 30 from a rural village of Masi-Manimba and 120 from konzo prone regions in Kahemba	Democratic Republic of the Congo	Rural and Urban.	Shotgun metagenomic sequencing	Observational/ Cross-sectional study	180	Stool samples	Not indicated.	Not indicated.	Not indicated.	Aim: To investigate how the structure of the gut microbiome varies across geographical contexts, as well as provide the first insight into the gut flora of children affected with this debilitating disease using shotgun metagenomic sequencing.	None.	The study findings indicate that the gut microbiome structure is highly variable depending on region of sampling, but most interestingly, the authors identify unique enrichments of bacterial species and functional pathways that potentially modulate the susceptibility of konzo in prone regions of the Congo.	NIH grant NIEHS/FIC R01ES019841, A. James Clark Distinguished Professor of Molecular Genetics Endowment and the Fogarty International Center of the National Institutes of Health (NIH) as well as the University of California Global Health Institute (UCGHI).
966	Evolution infecal bacterial/viral composition in infants of two central African countries (Gabon and Republic of the Congo) during their first month of life	Brazier et al, 2017	Yes	No disease studied.	Newborns and their mothers recruited in the university hospital of Angondjé, Gabon, and the university hospital of Brazzaville, Republic of the Congo.	Gabon and the Republic of Congo.	Not indicated.	Ion torrent PGM 16S metagenomic sequencing.	Longitudinal study design	15	Stool samples	Not indicated.	Not indicated.	Not indicated.	Aim: To analyze the different steps involved in the infant gut bacterial/virus seeding and to monitor the changes of the gut microbiota community in the early days of life.	None.	Overall, the bacterial microbiota communities displayed a similar diversification and expansion in newborns within and between countries during the first four weeks of life.	Centre National de la Recherche Scientifique (CNRS), Centre International de Recherche Médicales de Franceville (CIRMF), Institut de Recherche pour le Développement (IRD) and Laboratoire mixte international (LMI) ZOFAC (IRD).
3000	GUT MICROBIOTA IMPACT ON ANGOLAN CHILDREN WITH SICKLE CELL DISEASE	Brito et al, 2022	Yes	Sickle cell disease. Disease is not of public health significance.	Children between 3–14 years old.	Angola	Not indicated.	NGS bacterial 16S RNA gene sequencing.	Observational study	72	Stool samples	3- 14 years	Not indicated.	Not indicated.	Aim: To sequence by NGS bacterial 16S RNA gene in order to characterize the gut microbiome of SCD children and healthy siblings, as a control.	None.	Their preliminary results showed that the SCD and control samples exhibited some notable differences in microbiota relative abundance, at different levels of classification.	This work was supported by FCT/Aga Khan (project nº330842553) and FCT/MCTES (UIDB/05608/2020 and UIDP/05608/2020)–H&TRC.
3188	Evaluating the Gut Microbiome in Children with Stunting: Findings from a South African Birth Cohort	Budree et al, 2019	Yes	No disease studied.	Children enrolled into the Drakenstein Child Health Study (DCHS), a birth cohort study.	South Africa	Peri-urban	16S rRNA sequencing	Observational study	138	Stool samples	Not indicated.	62/76	Not indicated.	Aim: To describe the microbiome of African children with stunting compared to those with normal linear growth.	None.	The findings demonstrate a microbial signature associated with stunting in African children.	Not indicated.
67	Associations of fecal microbial profiles with breast cancer and non-malignant breast disease in the Ghana Breast Health Study	Byrd et al, 2021	Yes	Breast cancer and non-malignant breast disease. Disease are of public health significance.	The study included 895 participants (N = 379 breast cancer cases, N = 102 nonmalignant breast disease cases, N = 414 population-based controls) attending three hospitals in Ghana, including Korle Bu Teaching Hospital in Accra and Komfo Anokye Teaching Hospital and Peace and Love Hospital in Kumasi.	Ghana	City	16S rRNA gene/ Illumina MiSeq sequencing platform sequencing	Case-control	895	Stool samples	18–74	Women only	Not indicated	Aim: To investigate associations of fecal bacteria with breast cancer and non-malignant breast disease in a case-control study conducted in Ghana.	None.	Their findings suggest that alpha diversity, overall microbiota composition, and taxa with hypothesized estrogen-conjugation and immune-related functions may be associated with breast diseases.	This work was supported by the Intramural Research Program in the Division of Cancer Epidemiology and Genetics, the US National Institutes of Health (NIH), National Cancer Institute (NCI).
718	Modifying gut integrity and microbiomein children with severe acute malnutritionusing legume-based feeds (MIMBLE): A pilot trial	Calder et al, 2021	Yes	Severe acute malnutrition. Not a disease of public health significance.	Fifty-eight children recruited within 24 hours of hospital admission following informed consent at Mbale Regional Referral Hospital, in Eastern Uganda.	Uganda	Not indicated.	16S Metagenomic Sequencing	Open-label, proof-of-principle randomized comparator pilot trial	58	Stool samples	> 6 months < 60months (5years)	31/27	Not indicated	Aim: The study investigates the use of a legume-enriched feed in the earliest stages of inpatient stabilization in acutely unwell children with (severe acute malnutrition) SAM at the highest risk of death.	Standard nutritional milk feeds with an added source of fermentable carbohydrate: (1) milled cowpea flour (experimental legume-based: cowpea [Cp]-enriched feeds [F] [CpFs]), (2) inulin (In) (experimental non-plant-based: inulin-supplemented feeds [InFs]), or (3) standard nutritional feeds F75 followed by F100 milk (Nutriset, France) (control feed: ConF).	Taken together, these results suggest that the CpF has a positive effect on the fecal microbiota, particularly between days 1 and 7. This is of particular interest, given that antibiotics are started over this period of time. It also appears that the microbiota functionality may be protected by the CpF with no fall in butyrate.	This study was funded by a fellowship award to N.C. from the Wellcome Trust Institutional Strategic Support Fund
967	The impact of storage conditions on human stool 16S rRNA microbiome composition and diversity	Carruthers 2019	Yes	No disease studied.	Three children, aged 12–14, from Bugoto Lake View Primary School, Mayuge District, Uganda.	Uganda	Not indicated.	Illumina 16S metagenomic sequencing	Observational/Cross-sectional study.	3	Stool samples	12–14 years	Not indicated.	Not indicated.	Aim: To address the impact of different preservative methods, time-to-freezing at ambient tropical temperatures, and stool heterogeneity on stool microbiome diversity and composition under real-life physical environments found in resource-limited fieldwork conditions.	Storage conditions.	Stool storage preservation method significantly influenced the bacterial profiles obtained, however, all samples remained identifiable to their child of origin. Stool stored at ambient temperature for up to 32 h did not significantly influence diversity and had minimal changes upon microbiota composition, which remained relatively stable across time-to-freezing regardless of preservation method u…	This work was supported by Wellcome, a Lord Kelvin Adam Smith Fellowship from the University of Glasgow, and the European Research Council Starting Grant.
24	Restitution of gut microbiota in Ugandan children administered with probiotics (Lactobacillusrhamnosus GG and Bifidobacterium animalis subsp.lactis BB-12) during treatment for severe acutemalnutrition	Castro-Mejía et al, 2020	Yes	Severe acute malnutrition (SAM). Not a disease of public health significance.	Children (400 SM and 22 controls) between 6 and 59 months with SAM admitted to at Mwanamugimu Nutrition Unit, Mulago National Referral Hospital, Kampala, Uganda.	Uganda	Not indicated	High-throughput 16S rRNA gene amplicon sequencing	Sub-study/ Prospective study nested in a randomized, double-blind, placebo-controlled trial	422	Stool samples	6-59 months	SM group: Males constituted 58% of the population, hence 168/232	Not indicated	Aim: To investigate GM development during rehabilitation from SAM, whether probiotics supplementation has any effects on the GM during inpatient and outpatient treatment of SAM, and whether GM composition and development is linked to the observed reduction in days with diarrhea when administered probiotics during the randomized controlled ProbiSAM trial.	Probiotics (Lactobacillus rhamnosus GG and Bifidobacterium animalis subsp. lactis BB-12).	The authors show that children with SAM have significantly reduced number of observed species and major compositional differences (β-diversity) compared to healthy subjects. Moreover, GM diversity and composition change over the course of rehabilitation from SAM and approach the GM of apparently healthy subjects as treatment progresses. Further, our study supports that non-oedematous and oedemato…	No funding
1034	Antenatal gut microbiome profiles and effect on pregnancy outcome in HIV infected and HIV uninfected women in a resource limited setting	Chandiwana et al, 2023	Yes	HIV (human immunodeficiency virus). Disease is of public health signififcance.	Pregnant women of at least 20 weeks` gestational age with plans to deliver at one of the four study sites (City of Harare Polyclinics namely, Kuwadzana, Rujeko, Budiriro, and Glenview), and their children.	Zimbabwe	Not indicated.	The Ion PGM System (ThermoFisher)	Cross-sectional sub-study	94	Stool samples	Not indicated.	Adults: Women only. Children: Not indicated.	Not indicated.	Aim: To investigate the gut microbiota in HIV-infected pregnant women in the third trimester, assess microbiota-related adverse birth outcomes, and determine risk factors associated with gut microbial composition.	None.	The results reported show that the species richness and taxonomy composition of the gut microbiota is altered in HIV-infected pregnant women, possibly reflecting intestinal dysbiosis. Some of the taxa were also associated with low infant birth weight.	This study was funded by the Botnar Foundation and the Department of Visceral Surgery and Medicine, Inselspital Bern and Bern University, Switzerland, a grant from the Swiss National Science foundation (SNF), and SNF Ambizione Grant.
33	Dissection of the gut microbiota in mothers and children with chronic Trichuris trichiurainfection in Pemba Island, Tanzania	Chen et al, 2021	Yes	Chronic Trichuris trichiura infection. Not a disease of public health significance.	Women aged 23–45 years and their children aged 1.5–2.6 years from Vitongoji village, Gombani village and Chake-Chake town.	Tanzania	Rural	16S rRNA gene sequencing/llumina MiSeq platform PE300 platform	Cross-sectional/comparative study	64	Stool samples	Mothers: 23–45 years. Children: 1.5–2.6 years	Chidren sex not indicated.	Not indicated	Aim: To compare the gut microbial community of T. trichiura-colonized and non-colonized individuals from Pemba Island, using 16 rRNA gene sequencing. To investigate mothers and their children from two rural villages and one town on Pemba Island and identify specific associations between helminth colonization and bacterial spe-cies in mothers and children.	None.	Generally, their data demonstrate that changes in gut microbial composition and structure occur in T. trichiura-infected individuals compared with uninfected individuals. Potentially, SCFAs-producing bacteria decrease in abundance in infected individuals. Similar decreases were observed in the beneficial bacteria Lactobacillus (in children) and Bifidobacterium (in mothers) and carbohydrate-degrad…	The work was funded by the University of Camerino, and by the School of Advanced Studies University of Camerino PhD Grant.
58	Gut microbiota in Malawian infants in a nutritional supplementation trial	Cheung et al, 2016	Yes	No disease studied.	Six (6)- to 18-month-old infants and children in rural Malawi	Malawi	Rural	16S rRNA gene multiplex sequencing/Illumina MiSeq instrument	Substudy of a 4-arm randomised controlled trial	213	Stool samples	6-8 months	117/96	Not indicated	Aim: To study aimed to examine whether two forms of lipid-based nutrient supplements (LNS) or a micronutrient-fortified corn–soya blend (CSB) are associated with changes and development of the gut microbiota in Malawian infants, to assess microbiota profiles at the ageof 6 and 18 months and to follow the changes during the 12-month period. Objective/s: To examine whether two forms of lipid-based …	Lipid-based nutrient supplements (LNS) or a micronutrient-fortified corn–soya blend (CSB)	In conclusion, in the rural Malawian context, infants who received iron-containing LNS or CSB for 12 months did not differ from non-recipients in the gut microbiota profiles. The authors observed gut microbiota features that are similar to those reported in other African studies but quite distinct from those of European infants.	The study was funded by Academy of Finland, Bill & Melinda Gates Foundation and National Research Foundation Singapore.
99	HIV-exposure, early life feeding practices and delivery mode impacts on faecal bacterial profiles in a South African birth cohort	Claassen-Weitz et al, 2018	Yes	HIV (human immunodeficiency virus). Disease is of public health significance.	Mother-infant pairs enrolled in the DCHS, a birth cohort study investigating the early life determinants of child health in a peri-urban area 60 kilometres from Cape Town, South Africa.	South Africa	Peri-urban	Bacterial 16S rRNA gene sequencing/llumina MiSeq	Observational pilot study	197	Stool samples	Infants: 4-28 weeks.	90 Mothers. Infants: 59/48	Black African and mixed ancestry	Aim: To characterize meconium and early life faecal bacterial profiles of HIV-exposed and -unexposed infants enrolled in a South African birth cohort study, the Drakenstein Child Health Study (DCHS). The authors also aimed to identify key determinants of infant meconium and faecal bacterial profiles in HIV-exposed and -unexposed infants. Furthermore, they aimed to compare infant meconium with mat…	HIV status, feeding practices and mode of delivery.	Major determinants of infant meconium bacterial profiles were mode of feeding and maternal BMI. HIV-exposure, on the other hand, was an important contributor to the composition of infant faecal bacterial profiles at 4–12 weeks of life, with HIV-exposed infants having higher bacterial diversity and reduced proportions of Bifidobacteria. Maternal faecal bacterial profiles following delivery were al…	This work was supported by the Wellcome Trust, United Kingdom , the US National Institutes of Health, the Bill and Melinda Gates Foundation Global Health Grant, the National Research Foundation (South Africa), the Carnegie Corporation of New York (United States of America), and the South African Medical Research Council.
2282	Early Benefits of a Starter Formula Enriched in Prebiotics and Probiotics on the Gut Microbiota of Healthy Infants Born to HIV+ Mothers: A Randomized Double-Blind Controlled Trial.	Cooper et al, 2016	Yes	Human immunodeficiency virus (HIV). Disease is of public health significance.	Healthy, full-term, newborn infants from human immunodeficiency virus (HIV)-positive mothers who had elected to feed their child exclusively with formula beginning from birth.	South Africa	Not indicated.	Polymerase chain reaction (PCR)	Randomized, controlled, double-blind	421	Stool samples	0- 6 months	219/202	Not indicated.	Aim: To evaluate the effect of a Test formula supplemented with both BMOS prebiotic and the probiotic Bifidobacterium animalis ssp lactis (B. lactis) on the early onset of bifidobacteria colonization in the gut of newborn infants delivered via vaginal or cesarean mode and to evaluate the safety of this new formula.	Test and Control formulas containin sufficient amounts of proteins (1.8 g/100 kcal, whey/casein ratio of 70:30), carbohydrates, fats, vitamins, and minerals to support the normal growth of healthy infants from birth to 6 months of age. The Test formula was additionally supplemented with a mixture of BMOS generated from whey permeate (containing galactooligosaccharides and milk oligosaccharides su…	The BMOS prebiotic in combination with B. lactis probiotic stimulated the growth of bifidobacteria in infants born by cesarean delivery at early life (within the first 10 days) when the gut colonization with bifidobacteria is delayed compared to vaginally born infants, suggesting a possible beneficial effect for these infants.	Nestec Ltd funded the study.
979	Growth and Morbidity of Gambian Infants are Influenced by Maternal Milk Oligosaccharides and Infant Gut Microbiota	Davis et al, 2017	Yes	No disease studied.	Gambian mother-infant pairs at weeks 1, 4, 8, 12, 16, 20, 24, 28, 32, 36, 40, 44, 48, and 52 postpartum.	Gambia	Rural	16S sequencing/ llumina MiSeq sequencing platform.	Experimental study design	33	Stool samples	Not indicated.	Adults: Women only. Children: Not indicated.	Not indicated.	Aim: To determine whether HMO content and composition are influenced by seasonal environmental changes, and whether changes in HMO composition are associated with protection from morbidity, improved growth, and with the intestinal microbiome.	None.	While bifidobacteria were the dominant genus in the infant gut overall, Dialister and Prevotella were negatively correlated with morbidity, and Bacteroides was increased in infants with abnormal calprotectin. These results lead us to conclude that shifts in the infant’s gut microbiota are both associated with infant health outcomes in The Gambia.	This work was funded in part by National Institutes of Health Awards and the Peter J. Shields Endowed Chair in Dairy Food Science (D.A.M.).
1048	Gut microbiomes from Gambian infants reveal the development of a non-industrialized Prevotella-based trophic network	deGoffau et al, 2022	Yes	No disease studied.	Children under the age of 3 years living in the north bank rural communities in the Upper River Region (URR) of The Gambia in West Africa.	Gambia	Rural	16S ribosomal RNA sequencing/ Illumina MiSeq.	A sub-study of a three-arm, parallel, randomized, placebo-controlled, double-blind study.	616	Stool samples.	7- 37 months	Not indicated.	Not indicated.	Aim: To study the development of these Prevotella-rich compositions, by investigatinh the gut microbiota of children aged between 7 and 37 months living in rural Gambia.	None.	Prevotella copri, Faecalibacterium prausnitzii and Prevotella stercorea were, on average, the most abundant species in these 1,389 samples (35%, 11% and 7%, respectively). Distinct bacterial trophic network clusters were identified, centred around either P. stercorea or F. prausnitzii and were found to develop steadily with age, whereas P. copri, independently of other species, rapidly became dom…	This IHAT-GUT study was supported by a Bill & Melinda Gates Foundation Grand Challenges New Interventions in Global Health award. The Nutrition Group of the MRC Unit The Gambia at LSHTM are supported by core funding MC-A760-5QX00 to the MRC Unit The Gambia/MRC International Nutrition Group by the UK MRC and the UK Department for the International Development (DFID) under the MRC/DFID Concordat ag…
71	Microbial gut evaluation in an Angolan paediatric population with sickle cell disease	Delgadinho et al, 2022	Yes	Sickle cell disease. Disease not of public health significance.	72 Angolan children (36 SCA pa-tients and 36 healthy siblings) aged between 3 and 14 years old. Half of the population were regularly attending consultations at ‘Hospital do Caxito’ in Bengo Province and the other half at ‘Hospital Pediátrico David Bernardino’ in Luanda.	Angola	Not indicated.	Bacterial 16S rRNA gene/Illumina NextSeq 550 instrument	Cross‐sectional study	72	Stool samples	3-14 years	42/30	Not indicated.	Aim: To sequence the bacterial 16S rRNA gene in order to characterize the gut microbiome of Angolan SCA children and healthy siblings.	None.	The data showed that the two groups exhibit some notable differences in microbiota relative abundance at different classification levels. Children with SCA have a higher number of the phylum Actinobacteria. As for the genus level, Clostridium cluster XI bacteria was more prevalent in the SCA children, whereas the siblings had a higher abundance of Blautia, Aestuariispira, Campylobacter, Helicobac…	This project was supported by FCT/Aga Khan, FCT/MCTES –H&TRC
84	How Hydroxyurea Alters the Gut Microbiome: A Longitudinal Study Involving Angolan Children with Sickle Cell Anemia	Delgadinho et al, 2022	Yes	Sickle Cell Anemia. Not a disease of public health significance.	33 patients previously diagnosed with SCA from 2 different hospitals in Angola, located in the province of Bengo at “Hospital Geral do Bengo” and in the city of Luanda at “Hospital Pediátrico David Bernardino”.	Angola	Not indicated.	16S rRNA gene sequencing/NextSeq550 instrument	Longitudinal study	33	Stool samples	4–12 years	42/24	Not indicated.	Aim: To assess the effect of hydroxyurea (HU) administration on the gut microbiome composition of an Angolan pediatric population with Angolan Sickle cell anemia (SCA) and compare it with the clinical, hematological, and biochemical parameters.	Hydroxyurea	Overall, our results suggest that hydroxyurea can influence the diversity and shape of the gut microbiome, implying that interactions between SCA phenotype, HU, and intestinal bacteria are important. However, it is not yet clear if the higher abundance of beneficial bacteria is a direct or indirect effect of HU treatment, being a consequence rather than a cause.	This project was supported by FCT/Aga Khan, FCT/MCTES—H&TRC.
1040	Gut microbiome function and composition in infants from rural Kenya and association with human milk oligosaccharides	Derrien et al, 2023	Yes	No disease studied.	6 to 11-month-old infants with no reported current acute or chronic illness, and z-scores for weight-for-age and weight-for-length ≥-3.	Kenya	Rural	Metagenomic shotgun sequencing	Observational/ Cross-sectional study.	105	Stool samples	6- 11 months	Not indicated.	Not indicated.	Aim: To describe the use of shotgun metagenomics to assess the variability of the gut microbiome at baseline in a subset of these Kenyan infants.	None.	The results show that the gut microbiome of partially breastfed Kenyan infants over the age of six months is enriched in bacteria from the Bifidobacterium community, including B. infantis, and that the high prevalence of a specific HM group may indicate a specific HMO-gut microbiome association.	This study was funded by Danone Nutricia Research.
85	Growth velocity in children with Environmental Enteric Dysfunction is associated with specific bacterial and viral taxa of the gastrointestinal tract in Malawian children	Desai et al, 2020	Yes	Environmental Enteric Dysfunction (EED). Not a disease of public health significance.	Children without diarrhea or HIV who were randomly selected from the parent study, which enrolled all eligible children aged 12 to 35 months old in a 9-village cluster of Nthenda in the Chikwawa district of southern Malawi.	Malawi	Rural	Bacterial 16S rRNA gene amplicon sequencing/Illumina MiSeq sequencer	Longitudinal cohort	49	Stool samples	12 to 35 months	Not indicated.	Not indicated.	Aim: To examine if viral or bacterial communities or individual taxa differ in children with EED across growth velocity categories. Objective/s: To define the comprehensive virome (eukaryotic virus and bacteriophage) and bacterial microbiome of a longitudinal cohort of rural Malawian children with extensive metadata and intestinal permeability testing at each time point, to examine the inter-rela…	None.	The data of the study demonstrate associations between specific bacterial and viral taxa and growth velocity, though the authors cannot yet prove a causal relationship exists between these measures.	This study was supported by a National Institutes of Health grant, Children’s Discovery Institute grants and the Bill and Melinda Gates Foundation grant.
2380	Analysis of Human Gut Microbiota Composition Associated to the Presence of Commensal and Pathogen Microorganisms in Côte d’Ivoire	Di Cristanziano et al, 2021	Yes	No disease studied.	Children and adults from semi-urban and non-urban localities in Côte d’Ivoire.	Côte d’Ivoire	Rural/semi-rural and semi-urban.	16S rRNA Gene Amplicon Sequencing	Observational study	76	Stool samples	<1- 59 years	36/40	Not indicated.	Aim: To explore gut microbiota composition associated to the presence of common enteric pathogens and commensal microorganisms, e.g., Blastocystis and Entamoeba species, in children and adults from semi-urban and non-urban localities in Côte d’Ivoire.	None	The co-occurrence of Blastocystis and commensal Entamoeba spp., despite the presence of other enteric pathogens including G. duodenalis, seems to preserve a high diversity, favor different bacterial consortia, and does not compromise the intrinsic ability of intestinal microbiota to restore and/or maintain homeostasis.	The present study was supported by the Koeln Fortune Program of the Faculty of Medicine of the University of Cologne (Germany) to V.D.C.
1017	Gut Bacterial Diversity and Growth among Preschool Children in Burkina Faso	Digitale et al, 2020	Yes	No disease studied.	Households who had two or three children between the ages of 6 and 59 months according to the most recent HDSS census.	Burkina Faso	Rural	16S rRNA gene sequencing	Prospective study design/ sub-study of a randomized controlled trial	155	Rectal swabs	6- 59 months	68/87	Not indicated.	Aim: To prospectively assess the association between gut microbial diversity and short-term growth in the cohort to better characterize whether changes in gut microbial diversity may affect growth.	Gut microbial diversity (Simpson’s alpha diversity and Shannon’s alpha diversity).	In this cohort of preschool children in Burkina Faso, antibiotics decreased alpha gut microbial diversity and increased ponderal growth. However, the authors did not find evidence that gut microbial diversity was associated with growth. Given these null findings, it appears unlikely that decreased gut microbial diversity mediates the relationship between antibiotics and ponderal growth. In explor…	Not indicated.
93	Gut Microbial Diversity in Antibiotic-Naive Children After Systemic Antibiotic Exposure: A Randomized Controlled Trial.	Doan et al, 2017	Yes	No disease studied.	A population-based sample of 80 children aged 1–60 months in the Dosso region of Niger randomized to receive a single dose of either oral azithromycin or placebo.	Niger	Rural	16S rRNA gene sequencing	Double-masked, randomized con-trolled clinical trial	80	Stool samples	1–60 months	49/31	Not indicated.	To evaluate the effects of antibiotic exposure on the pediatric gut microbiome diversity	1-time dose of azithromycin	In conclusion, the paediatric gut microbiome is sensitive to antibiotic exposure. A single dose of antibiotic can result in a significant reduction in bacterial diversity.	This study was supported by the Bill and Melinda Gates Foundation, the Peierls Foundation, the National Eye Institute of the National Institutes of Health, the Research to Prevent Blindness Career Development Award; and an unrestricted grant from Research to Prevent Blindness.
976	Mass Azithromycin Distribution and Community Microbiome: A Cluster-Randomized Trial	Doan et al, 2018	Yes	No disease studied.	Children aged 1–60 months in the Dossa region of Niger.	Niger	Village	Metagenomic deep sequencing/ Illumina HiSeq 4000	Double-masked, cluster randomized controlled clinical trial	300	Stool samples	1- 60 months	Not indicated.	Not indicated.	Aim: To test whether the gut microbiome in preschool children was affected 6 months after the previous antibiotic distribution in the relatively antibiotic-naïve, high–childhood mortality setting of Niger.	Azithromycin or placebo	Two mass azithromycin administrations, 6 months apart, in preschool children led to long-term alterations of the gut microbiome structure and community diversity. Long-term microbial alterations in the community did not imply disease but were associated with an improvement in childhood mortality.	This study was supported by the Bill and Melinda Gates Foundation, the National Eye Institute of the National Institutes of Health, the Research to Prevent Blindness Career Development Award, and an unrestricted grant from Research to Prevent Blindness.
980	Gut microbiome alteration in MORDOR I: a community-randomized trial of mass azithromycin distribution	Doan et al, 2019	Yes	No disease studied.	Preschool children from 30 Nigerien communities randomized to either biannual azithromycin or placebo.	Niger	Village	Metagenomic RNA sequencing/ HiSeq 4000 or NovaSeq system (NovaSeq 6000; Illumina).	A cluster randomized controlled trial	600	Stool samples	Not indicated.	Not indicated.	Not indicated.	Aim: To examine the gut microbiome of preschool children from 30 Nigerien communities randomized to either biannual azithromycin or placebo.	Azithromycin or placebo.	In summary, the authors have shown that the same MDA that caused a reduction in childhood mortality also affected the gut microbiome i.e. reduced certain gut bacteria, including known pathogens. Specifically, azithromycin distribution altered microbial metabolic function and decreased organisms known to cause human disease. These benefits came at the potential cost of selecting for macrolide resi…	This work was supported by the Bill and Melinda Gates Foundation, the Peierls Foundation, a Research to Prevent Blindness Career Development Award and an unrestricted grant from Research to Prevent Blindness.
1103	Effects of iron supplementation on dominant bacterial groups in the gut, faecal SCFA and gut inflammation: a randomised, placebo-controlled intervention trial in South African children	Dostal et al, 2014	Yes	No disease studied.	6- to 11-year-old children from two primary schools that serve low-income rural villages in the Province of KwaZulu-Natal in eastern South Africa.	South Africa	Rural	Quantitative PCR (qPCR)/ ABI PRISM 7500-PCR sequence detection system.	A randomised, placebo-controlled intervention trial.	73	Stool samples	6- 11 years	40/33	Not indicated.	Aim: To investigate the impact of oral supplementation of Fe as FeSO4 over a time period of 38 weeks on the concentrations of dominant bacterial groups in the gut, faecal SCFA and faecal calprotectin, a gut inflammation marker, in Fe-deficient school children living in rural South Africa compared with a placebo treatment without FeSO4 over the same time period.	Fe as FeSO4 for 4 d/week or identical placebo.	The present study suggests that in African children with a low enteropathogen burden, Fe status and dietary Fe supplementation did not significantly affect the dominant bacterial groups in the gut, faecal SCFA concentration or gut inflammation.	The present study was supported by the Swiss National Science Foundation; Eunice Kennedy Shriver National Institute of Child Health and Human Development; and Unilever Research and Development, Vlaardingen, The Netherlands. Paul Lohmann GmbH (Lomapharm, Emmertal, Germany) provided the Fe supplements.
136	Gut Microbiome Profiles Are Associated With Type 2 Diabetes in Urban Africans	Doumatey et al, 2020	Yes	Type 2 Diabetes mellitus (T2DM). It is a diseas of public health significance.	291 participants (193 controls and 98 cases) enrolled at a single site—Ibadan, Nigeria—one of the largest cities in sub-Saharan Africa (SSA).	Nigeria	Urban	16S V4 rRNA gene sequencing/the Illumina MiSeq platform	Case-control	291	Stool samples	Not indicated.	Not indicated.	Not indicated.	Aim: To describe the GM microbial composition in non-T2D population samples (controls) and comparing the phylogenetic diversity and taxonomic relative abundance between controls and cases.To conduct functional analyses to predict genes and pathways abundance in these two groups.	None.	In conclusion, the study showed that non-T2D adults living in a Nigerian city have a characteristic microbial composition that is mainly composed of Firmicutes (Clostridiales) and Actinobacteria (90%). The GM of cases have a bacterial signature consisting of increased sulfate-reducing spp. Desulfovibrio piger, Prevotella, Peptostreptococcus, and Eubacterium and is characterized by a moderate dysb…	The NIH Grant from the National Institute on Minority Health and Health Disparities funded the study. This study was also supported by the Intramural Research Program of the Center for Research on Genomics and Global Health.
2612	Cotrimoxazole Prophylaxis Increases Resistance Gene Prevalence and α-Diversity but Decreases β-Diversity in the Gut Microbiome of Human Immunodeficiency Virus–Exposed, Uninfected Infants	D'Souza et al, 2020	Yes	Human Immunodeficiency Virus (HIV). Disease is of public health significance.	Infants with birthweights >2000 g born to HIV-infected mothers.	South Africa	Not indicated.	Whole-metagenome sequencing	Experimental study	63	Stool samples	Not indicated.	Not indicated.	Not indcated.	Aims/Objectives: To we sequence stool samples from a randomized controlled trial of cotrimoxazole treatment in 63 HEU infants, as well as to compare the microbiome characteristics between cotrimoxazole-treated HEU infants (CTX-T infants) and HEU infants not treated with cotrimoxazole (CTX-N infants).	Cotrimoxazole prophylaxis	Cotrimoxazole prophylaxis in HEU infants decreased gut microbiome β-diversity and increased antibiotic resistance gene α-diversity and prevalence.	This work is supported in part by awards to G. D. from the National Institute of General Medical Sciences, the National Institute of Allergy and Infectious Diseases, and the Eunice Kennedy Shriver National Institute of Child Health and Human Development of the National Institutes of Health; the Edward Mallinckrodt Jr Foundation (Scholar Award); and the Bill & Melinda Gates Foundation Grand Challe…
64	The Impact of Anthelmintic Treatment on Human Gut Microbiota Based on Cross-Sectional and Pre- and Postdeworming Comparisons in Western Kenya.	Easton et al, 2019	Yes	No disease is studied.	Residents of 5 rural Kenyan villages prior to and 3 weeks and 3 months following albendazole (ALB) therapy for clearance of soil-transmitted helminths (STH).	Kenya	Rural	MiSeq16S rRNA gene sequencing	Longitudinal and cross-sectional	39	Stool samples	3 to 84 years	Not indicated.	Not indicated.	Aim: To utilize stool samples collected longitudinally from an area where A. lumbricoides and N. americanus are endemic to examine the relationship between these STH and the human gut microbiota.	400 mg albendazole (ALB)	This study contributes to the ongoing discussion over whether there are measurable impacts of STH infection on the human stool microbiota. In particular, The authors were able to identify changes in the microbiota associated with clearance of N. americanus infection, which are not seen posttreatment in individuals who were uninfected pretreatment.	Bill and Melinda Gates Foundation
149	The Effect of ss-Glucan Prebiotic on Kidney Function, Uremic Toxins and Gut Microbiome in Stage 3 to 5 Chronic Kidney Disease (CKD) Predialysis Participants: A Randomized Controlled Trial	Ebrahim et al, 2022	Yes	Chronic Kidney Disease (CKD). Disease is of public health sisgnificance.	Participants (over 18 years) attending a predialysis clinic in Cape Town, South Africa, with CKD stage 3 to 5 (classified by a GFR< 60 mL/min per 1.73 m2) were enrolled.	South Africa	Not indicated.	16S rRNA sequencing /Illumina MiSeq platform	Randomized control trial	59	Stool samples	Not indicated.	34/25	Not indicated.	Aim: To investigate the effect of ß-glucan on kidney function, uremic toxins and the gut microbiome in stage 3 to 5 CKD participants.	ß-Glucan Prebiotic	In conclusion, the current study found that the supplementation of ß-glucan fiber resulted in favourable change in the composition of the gut microbiome. The authors therefore reject the hypothesis that kidney function would change with the prebiotic and accept the hypothesis that the gut microbiome improved with the prebiotic intervention.	This study received funding from the Early Researcher Fund (Stellenbosch University), Thuthuka National Research Fund (Thuthuka grant number: 129901) and the Harry Crossley Foundation.
897	Gut microbiota in forty cases of egyptian relapsing remitting multiple sclerosis	Elgendy et al, 2021	Yes	Multiple sclerosis (MS). Not a disease of public health significance.	40 newly diagnosed MS patients recruited consecutively from the Department of Neurology, Assiut University Hospitals and 22 age- and sex-matched healthy volunteers as controls.	Egypt	Not indicated.	SYBR Green qRT-PCR/7500 Fast Real-Time PCR System	Prospective study	62	Stool samples	16-45	In elapsing remit-ting multiple sclerosis (RR-MS) patients: 30/10	Not indicated.	Aim: To compare the abundance of some gut microbiota in RR-MS patients and a healthy matched control group.	Remitting multiple sclerosis	The study results suggest that changes in gut microbiota are associated with exacerbation of MS disease. Disruption of the intestinal microbiota may result in the alteration of certain bacteria and their metabolites that may affect the immune balance leading to predisposition to proinflammatory diseases such as MS.	This research was funded by the Grant Office, School of Medicine, Assiut University.
3100	Absence of Mitsuokella multacida is associated with early onset of colorectal cancer	Elkholy et al, 2020	Yes	Colorectal cancer. Disease is of public health sisgnificance.	8 healthy individuals and 20 Egyptian CRC patients.	Egypt	Not indicated.	16S rRNA amplicon sequencing	Retrospective convenience sample design	28	Colonic mucosal samples	Not indicated.	Not indcated.	Not indicated.	Aim/ objective: To assesse the colonic microbiota and the expression of specific host response genes in normal colonic mucosal samples from 8 healthy individuals and 20 Egyptian CRC patients.	None.	These findings suggest that the oncoprotective effect of Mitsuokella multacida should be further investigated.	The study is supported by the US-Egypt STDF grants (NAS 2000007148 and 144/17) and the Impact funds of University of Alabama at Birmingham.
2522	Mycobacterium avium subsp. paratuberculosis and microbiome profile of patients in a referral gastrointestinal diseases centre in the Sudan	Elmagzoub et al, 2022	Yes	Gastrointestinal diseases (GID). Disease type not specified.	Patients admitted to the reference GID hospital in the Sudan over a period of 8 months.	Sudan	Not indicated.	16S rDNA nanopore sequencing	Cross- sectional study	86	Stool samples	21- 80 years	49/37	Not indicated.	Aim: To investigate the presence of MAP in humans by targeting patients with chronic gastrointestinal diseases (GID), who have been referred to the GID reference hospital in the Sudan (ISSH).	None.	A unique microbiome profile of MAP-positive patients in comparison to MAP-negative was found. These findings suggest that a considerable proportion of the population could be MAP infected or carriers.	The study is part of a research project (404935781) funded by the Deutsche Forschungsgemeinschaft (DFG), http://gepris.dfg.de/gepris/projekt/404935781.
2940	Impact of Geographical Location on the Gut Microbiota Profile in Egyptian Children with Type 1 Diabetes Mellitus: A Pilot Study	Elsherbiny et al, 2022	Yes	Type 1 Diabetes Mellitus	The first group was from Assiut in Upper Egypt and was represented by seventeen diabetic children (AsDM) and eight healthy subjects as controls (AsC). The second group was from Ismailia in Lower Egypt and was composed of fifteen diabetic children (IsDM) and eight healthy subjects as controls (IsC).	Egypt	Not Indicated.	16S rRNA gene sequencing/ Illumina MiSeq platform	Case-control study	48	Stool samples	6- 9 years	27/21	Not indicated.	Aim: This study aimed to study the microbiota of a sample of healthy and controlled diabetic Egyptian children in two Egyptian cities.	None.	There are a number of consistent changes in the microbiota profile characterizing the diabetic groups irrespective of the geographical location including significantly lower alpha diversity, mean Firmicutes/ Bacteroidetes (F/B) ratio, and reduced proportions of Firmicutes and genera Prevotella and Ruminococcus. There are also significantly enriched representations of Actinobacteria, Bacteroidetes…	This research was funded by the Grant Office of the Faculty of Medicine, Assiut University.
1061	Molecular characterization of gut microbial structure and diversity associated with colorectal cancer patients in Egypt	El-Sokkary MMA, 2022	Yes	Colorectal cancer (CRC). Disease is of public health significance.	Twenty-seven Egyptian CRC patients and 7 control stool samples.	Egypt	Not indicated.	Quantitative PCR (qPCR)	Observational/ Cross-sectional study.	34	Stool samples	Not indicated.	Not indicated.	Not indicated.	Aim: To apply new methodologies to detect different potential biomarkers, which are associated with CRC development in samples isolated from an Egyptian hospital.	None.	The results demonstrated increased abundance of fusobacterium or bifidobacterium, and that they can be considered as a sign for impairment or a diseased condition. The prevalence of fusobacterium in fecal microbiota, in addition to some other species such as Porphyromonas gingivalis, Prevotella intermedia, Peptostreptococcus magnus, Porphyromonas gingivalis, E. saphenum and E. faecium could be us…	Not indicated.
28	Study of gut microbiome in Egyptian patients with autoimmune thyroid diseases.	El-Zawawy et al, 2021	Yes	Hashimoto's thyroiditis (HT) and Graves’ disease (GD). Not diseases of public health significance.	20 Egyptian patients with newly diagnosed and uncontrolled ATD (GD & HT) who were recruited from the Endocrinology Outpatient Clinic and 30 Egyptian healthy subjects with matched age, sex, BMI, and dietary habits as a con-trol group.	Egypt	Not indicated.	SYBR green real-time PCR	Observational/Cross-sectional study	50	Stool samples	20-58 years	27/23	Not indicated.	Aim: To elucidate changes in gut microbiome in Egyptian patients with autoimmune thyroid disorders (ATD).	None.	Egyptian patients with ATD (GD and HT) show dysbiosis of the gut microbiome. This highlights an important relationship between gut microbial dysbiosis and the etiopathogenic chain of ATD.	No financial support was received for the study.
288	Changes in the Human Gut Microbiota Associated With Colonization by Blastocystis sp. and Entamoeba spp. in Non-Industrialized Populations	Even et al, 2021	Yes	No disease studied.	134 healthy adults (59 males and 75 females), living in three different areas of Cameroon (76 in rural, 26 in semi-urban and 32 in urban environments).	Cameroon	Rural, semi-urban and urban.	16S rRNA gene amplicon sequencing/Illumina MiSeq 300	Observational study	134	Stool samples	18 --64 years	75/59	Not indicated.	Aim/objective: To study the potential interaction of the two intestinal protozoa (Blastocystis sp. and Entamoeba spp.) in the population in order to determine whether their presence has a comparable impact on the gut microbiota from colonized individuals. To achieve this, given that Entamoeba colonization is rare (if not absent) in industrialized countries, the study focused on the intestinal mic…	None.	While the authors can strongly suggest that Blastocystis and Entamoeba likely act through different mechanisms to interact with the gut bacterial microbiota, their study is observational and thus focused on correlations and cannot unveil the causal relationships between gut protozoa and bacterial microbiota. In order to uncover mechanisms by which protozoa colonization influences the intestinal m…	This work was supported by the ANR (Agence Nationale de la Recherche) grant MICROREGAL, as well as by a research price IDF-FRM (Institut Danone France—Fondation pour la Recherche Médicale).
2918	Characterization and Profiling of Gut Bacterial Microbiome and Pathobionts among HIV-negative and HIV-infected individuals in Cameroon	Eyongabane Ako et al, 2022	Yes	Human Immunodeficiency Virus (HIV). Disease is of public health significance.	25 study participants from the HIV treatment Unit (UPEC) at the Buea Regional Hospital, Southwest Region, Cameroon and 15 HIV-negative controls (negative).	Cameroon	Not indicated.	16S rRNA gene sequencing/ Illumina MiSeq sequencer	Case-control and comparative study design	40	Stool samples	18- 60 years	28/12	Not indicated.	Aim: To identify, characterize, and compare microbiome communities between HIV-positive and HIV-negative individuals using culture-independent techniques.	None.	There is high diversity and specie uniqueness of the gut microbiome in Cameroon. Functionality of the gut microbiome needs to be investigated. There are gut pathobionts circulating among HIV-infected and HIV-negative individuals in Cameroon. The origin of pathobionts is a call for concern. Unique gut microbiome OTU sequences are significantly high among HIV-infected. Emerging strains of new micro…	None.
1095	Gut microbiota imbalances in Tunisian participants with type 1 and type 2 diabetes mellitus	Fassatoui et al, 2019	Yes	Type 1 and type 2 diabetes mellitus. Disease is of public health significance.	20 patients with diabetes from the National Institute of Nutrition of Tunis, and 11 participants without diabetes from the Institut Pasteur de Tunis.	Tunisia	Not indicated.	Quantitative PCR (qPCR)	Comparative study	31	Stool samples	20- 67 years	20/11	Not indicated.	Aim: To characterize the composition of gut microbiota of Tunisian participants, with and without diabetes, by evaluating the proportions of Firmicutes, Bacteroidetes, A.muciniphila, F.prausnitzii, and Bifidobacterium spp.	None.	In the present study, the authors determined an alteration of the composition of gut microbiota in Tunisian participants with diabetes compared with the group without diabetes. They also detected a reduction in the amount of A. muciniphila, Firmicutes, and F. prausnitzii in Tunisian participants with diabetes, the abundance of A. muciniphila was also affected by glycemic level.	This work was supported in part by the Ministry of Higher Education and Scientific Research; the Universitat de Girona Project and the Spanish Ministry of Education and Science Project.
36	Composition of Gut Microbiota of Children and Adolescents With Perinatal Human Immunodeficiency Virus Infection Taking Antiretroviral Therapy in Zimbabwe	Flygel et al, 2020	Yes	Human Immunodeficiency Virus (HIV). Disease of public health significance.	HIV-infected children in Harare, Zimbabwe aged 6–16 years without chronic lung disease, defined as no prior history of heart/lung diseases, tuberculosis (TB), no chronic cough, reported chest pain or shortness of breath during exercise, and HIV-uninfected participants recruited at the same outpatient clinic.	Zimbabwe	Not indicated.	16S ribosomal ribonucleic acid sequencing/Illumina Miseq instrument.	Cross-sectional study	280	Rectal swabs	HIV-infected children: 6–16 years	135/145	Not indicated.	Aim: To investigate the gut microbiota in HIV-infected and HIV-uninfected children in Harare, Zimbabwe and to evaluate the association between gut microbial composition and clinical and laboratory parameters (chronic lung disease, CD4+ T-cell count, viral load [VL]).	Antiretroviral Therapy	The results of the authors indicate that gut microbiota is altered in HIV-infected children, although diversity improves with increasing duration of ART. Further studies, in which the gut microbiota, markers of microbial translocation, and immunological markers are measured, are warranted to provide better insight to the pathogenesis of HIV and its related complications.	The BREATHE trial was funded by the Global Health and Vaccination Programme of the Medical Research Council of Norway. The analysis of rectal swabs was funded by Northern Norway Regional Health Authority (Helse Nord RHF). The microbiome platform at the University of Cape Town is supported by National Institutes of Health (NIH) Common Fund, through the Office of Strategic Coordination/Office of th…
165	Rectal microbiota diversity in Kenyan MSM is inversely associated with frequency of receptive anal sex, independent of HIV status	Gebrebrhan et al, 2021	Yes	Human-immunodeficiency virus (HIV)	Being biologically male, at least 18 years of age and reporting sex with men (MSM).	Kenya	Not indicated.	16s rRNA sequencing/Illumina MiSeq platform	Cross-sectional study	80	Rectal sponges	Not indicated.	Men only.	No indicated.	Aim: To profile the composition of the rectal microbiome in Nairobi men who have sex with men (MSM) at a high risk for HIV acquisition.	HIV and frequency of receptive anal sex.	In addition to decreased alpha diversity in men with HIV infection, the authors also established a dose-dependent relationship between receptive anal sex with multiple partner types, controlling for HIV, and reduced rectal microbiome alpha diversity. These findings suggest that MSM-associated rectal microbiomes are likely linked directly to specific types of sexual activity, rather than confoundi…	This project was funded by Canadian Institutes of Health Research (CIHR), Research Manitoba and the University of Manitoba.
49	Gut Microbiome of Coexisting BaAka Pygmies and Bantu Reflects Gradients of Traditional Subsistence Patterns	Gomez et al, 2016	Yes	No disease studied.	28 BaAka and 29 Bantu inhabiting Dzanga Sangha Protected Areas (DSPA), Central African Republic.	Central African Republic	Village	16S rRNA gene sequencing/ 454- pyrosequencing.	Observational study	57	Stool samples	Not indicated.	Not indicated.	BaAka Pygmies and Bantu	Aim: To explore gut bacterial communities in the BaAka rainforest hunter-gatherers and their agriculturalist Bantu neighbors in the Central African Republic.	None.	Although the microbiome of both groups is compositionally similar, hunter-gatherers harbor increased abundance of Prevotellaceae, Treponema, and Clostridiaceae, while the Bantu gut microbiome is dominated by Firmicutes. The results demonstrate gradients of traditional subsistence patterns in two neighboring African groups and highlight the adaptability of the microbiome in response to host ecolog…	This work was supported by an NSF grant, the Czech Science Foundation, funds from the University of Minnesota College of Biological Sciences, and was cofinanced by the European Social Fund and the state budget of the Czech Republic. Further support came from “CEITEC”- Central European Institute of Technology, the European Regional Development Fund, and The Institute of Vertebrate Biology, Academy…
2186	Breast Milk and Gut Microbiota in African Mothers and Infants from an Area of High HIV Prevalence	González et al, 2013	Yes	Human Immunodeficiency Virus (HIV)	Apparently healthy women and their breastfeeding infants.	Mozambique	Rural	Quantitative real-time PCR (qRTi-PCR)	Cross-sectional study	121	Stool samples	Women: Not indicated. Infants: <2 weeks- 12 months	Infants: 53/68	Not indicated.	Objective: To describe the microbiological composition of breast milk in women and their infant's gut in a population exposed to high prevalence of infections.	None.	Both breast milk and faecal microbiota composition varied with lactation period, which might be related to changes in the type of feeding over time and/or in the milk's biochemical characteristics. These findings provide insights into interactions between commensal bacteria and HIV infection in human milk and the role of these bacteria in mucosal protection against infections in breastfed infants.	This work was supported by a grant from “la Caixa” Foundation managed by the Spanish NGO Africa Viva. The CISM receives core funding from the Spanish Agency for International Cooperation and Development (AECID).
3041	ASSOCIATIONS BETWEEN HIV STATUS AND THE GUT MICROBIOTA IN SOUTH AFRICAN CHILDREN WITH LOW IRON STORES	Goosen et al, 2021	Yes	Human immunodeficiency virus (HIV). Disease is of public health significance.	8 to 13-year-old virally suppressed HIV+ and HIV-ve children with low iron stores (inflammation-unadjusted serum ferritin _35 mg/L) from Cape Town, South Africa.	South Africa	Not indicated.	16S rRNA sequencing	Comparative cross-sectional study	64	Stool samples	8- 13 years	Not indicated.	Not indicated.	Aim: To compare gut microbiota between virally suppressed HIV+ children and children without HIV (HIV-ve).	None.	Prevotella-enrichment, evident in both groups, was likely influenced by the plant-based diet. The significantly lower relative abundance of beneficial Bifidobacterium among the HIV+ children may be cause for concern as reductions in Bifidobacterium following oral iron supplementation (a probable intervention in this population) have been reported.	Not indicated.
76	The effect of oral iron supplementation on the gut microbiota, gut inflammation, and iron status in iron-depleted South African school-age children with virally suppressed HIV and without HIV.	Goosen et al, 2022	Yes	Human-immunodeficiency virus (HIV). Disease is of public health significance.	Children representing an urban population from the Cape Town Metropole who are 8–13 years old, had no current self-reported acute illness, had not used iron containing supplementation in the 3 months preceding the visit, and among the HIV+children, are virally suppressed (<50 HIV RNA copies/mL plasma) based on routine annual blood work.	South Africa	Urban	16S rRNA sequencing/Illumina MiSeq platform	Before-after intervention study with case–control comparisons.	64	Stool samples.	8–13 years	33/31	Not indicated.	Aim: To determine the effect of oral iron supplementation on gut microbiota composition, gut infammation, and iron status in iron-depleted South Africa school-aged children living with HIV (HIV+) but virally suppressed on antiretroviral therapy and children without HIV (HIV-ve).	Oral iron supplementation	The findings suggest that oral iron supplementation can significantly improve haemoglobin and iron status without increasing pathogenic gut microbial taxa or gut inflammation in iron-depleted virally suppressed HIV+ and HIV−ve school-age children.	This research study was nested within a series of iron studies funded by the Thrasher Research Fund, USA.
2411	Associations of HIV and iron status with gut microbiota composition, gut inflammation and gut integrity in South African school‐age children: A two‐way factorial case–control study	Goosen et al, 2023	Yes	Human immunodeficiency virus (HIV)	8‐to 13‐year‐old HIV+ and HIV−children at the Family Centre for Research with Ubuntuin Cape Town, South Africa.	South Africa	Not indicated.	16S rRNA sequencing/ Illumina MiSeq platform	Two‐way factorial case–control study	166	Stool samples	8- 13 years	78/88	isiXhosa African and Capetonian mixed ancestry.	Aim: To determine the associationsof HIV and iron status with gut microbiota composition, gut inflammation and gut integrity in South African school‐age children.	None.	In 8‐to 13‐year‐old virally suppressed HIV+ and HIV− children with or without iron defifiency (ID), ID was associated with increased gut inflammation and changes in the relative abundance of specific microbiota. Moreover, in HIV+ children, ID had a cumulative effect that further shifted the gut microbiota to an unfavourable composition.	Thrasher Research Fund; South AfricanMedical Research Council Bongani MayosiNational Health Scholars Programme; L'Oréal‐UNESCO for Women in Science sub‐Saharan Africa Fellowship Programme; Harry Crossley Foundation; Ernst and Ethel Eriksen Trust; KU Leuven, VIB and the Rega Institute; Research Foundation Flanders.
46	Maternal fecal microbiome predicts gestational age, birth weight and neonatal growth in rural Zimbabwe.	Gough et al, 2021	Yes	No disease studied.	In a pre-specified substudy of SHINE, 1,656 mother-child pairs were selected for biological specimen collection from the mother (HIV+) during pregnancy, then at 1mo post-partum, and intensive collection from the infant at 1, 3, 6, 12 and 18 months of follow-up.	Zimbabwe	Rural	Whole metagenome shotgun sequencing /Illumina HiSeq 2500 platform.	Sub-study of a cluster-randomized trial	422	Stool samples	Not specified.	98/117	Not indicated.	Aims/Objectives: To perform whole metagenome shotgun sequencing of maternal fecal specimens collected during pregnancy and at 1mo post-partum to identify maternal microbes and metabolic functions that might influence infant gestational age, size at birth, or growth during the neonatal period. To also investigate the impact of the SHINE WASH intervention, baseline sanitation and hygiene-related fa…	None.	The study illustrates that the pregnancy faecal microbiome, primarily the abundance of resistant-starch degraders, is an important contributor to birth weight and neonatal growth, and to a lesser extent gestational age, in infants of rural Zimbabwean mothers who consume a diet high in maize.	The study was funded by the following: Bill and Melinda Gates Foundation, UK Department for International Development, Wellcome Trust, Swiss Agency for Development and Cooperation, US National Institutes of Health, and UNICEF.
2369	Longitudinal and Comparative Analysis of Gut Microbiota of Tunisian Newborns According to Delivery Mode	Hanachi et al, 2022	Yes	Not indicated.	Mothers who had a non-declared pathology and did not receive antibiotics, anti-inflammatory drugs, or immunosuppressive therapy during the last trimester of pregnancy, and their elective cesarean section (ECS) and vaginally delivered (VD) newborns.	Tunisia	Semi-rural	High-resolution shotgun sequencing	Longitudinal study	10	Stool samples	Mothers: 23- 39 years	Newborns: 4/6	Not indicated.	Aim/objective: To decipher the composition and dynamics of the gut microbiota composition of Tunisian newborns.	None.	Both ECS and VD showed a profile dominated by Proteobacteria, Actinobacteria, and Firmicutes. However, ECS showed an underrepresentation of Bacteroides and an enrichment of opportunistic pathogenic species of the ESKAPE group, starting from the second week. Besides revealing the intestinal microbiota of Tunisian newborns, this study provides novel insights into the microbiota perturbations caused…	This project was partly funded by H3ABioNet, which was supported by the National Institutes of Health Common Fund. Financial support was also afforded by the foundation Mérieux.
1068	Brief overview of dietary intake, some types of gut microbiota, metabolic markers and research opportunities in sample of Egyptian women	Hassan et al, 2022	Yes	No disease studied.	115 Egyptian women (82 were obese (59 without MetS and 23 with MetS) and 33 were normal weight.), with ages ranged between 25 and 60 years.	Egypt	Not indicated.	Real time PCR (Polymerase Chain Reaction)	Cross-sectional study	115	Stool samples	25- 60 years	Women only	Not indicated.	Aim: To identify the interplay of the intestinal microbiota with obesity, metabolic markers and some dietary ingredient; especially the fat content; among a sample of Egyptian women.	None.	It was concluded from this study that both Bacteroidetes and Firmicutes bacteria are the most abundant bacteria in the gut among the studied sample, whether in the obese with and without MetS or normal weights women. Findings of this study revealed that dietary factors, dysbiosis, and the metabolic product short chain fatty acids have been implicated in causing metabolic defects.	Funding was provided by The Science, Technology & Innovation Funding Authority (STDF) in cooperation with The Egyptian Knowledge Bank (EKB).
1459	The Microbiome in Posttraumatic Stress Disorder and Trauma-Exposed Controls: An Exploratory Study	Hemmings et al, 2017	Yes	Posttraumatic Stress Disorder and Trauma. Condition is not of public health significance.	18 PTSD and 12 trauma-exposed (TE) control participants of South African mixed ancestry.	South Africa	Not indicated.	16S ribosomal RNA (rRNA) gene sequencing	Cross-sectional study	30	Stool samples	Not indicated.	21/9	South African mixed ancestry population	Aim/objective: To investigate the gut microbiome in a South African sample of PTSD-affected individuals and trauma-exposed (TE) controls, to identify potential differences in microbial diversity or microbial community structure.	None.	In this exploratory study, measures of overall microbial diversity were similar among individuals with PTSD and TE controls; however, decreased total abundance of Actinobacteria, Lentisphaerae, and Verrucomicrobia was associated with PTSD status.	Medical Research Council of South Africa, Department of Science and Technology and the National Research Foundation, Alfred P. Sloan Foundation , Colorado Clinical & Translational Sciences Institute (CCTSI), Colorado Department of Public Health and Environment, the National Institutes of Health (NIH), the Department of Veterans Affairs Office of Research and Development (VA-ORD), the Office of Na…
1800	An Alternative Oat-Containing, Ready-To-Use, Therapeutic Food Does Not Alter Intestinal Permeability or the 16S Ribosomal RNA Fecal Microbiome Configuration Among Children With Severe Malnutrition in Sierra Leone: A Randomized Controlled Trial	Hendrixson et al, 2023	Yes	Severe Acute Malnutrition (SAM). Disease is not of public health significance.	Sierra Leonean children aged 6-59 months with SAM.	Sierra Leone	Not indicated.	16S rRNA sequencing/ llumina MiSeq sequencer	Prospective, randomized, double-blinded, controlled clinical trial	119	Stool samples	6- 59 months	68/51	Not indicated.	Objective: To determine the effects of o-RUTF on intestinal permeability, as measured by lactulose permeability, and the 16S ribosomal RNA (rRNA) fecal microbiome configuration of children with SAM.	Oat ready-to-use therapeutic food (o-RUTF) and standard RUTF (s-RUTF).	Despite remarkably different compositions of o-RUTF and s-RUTF, no differences were identified in lactulose permeability or the fecal 16S rRNA configuration among children with SAM receiving these foods. These results suggest that the o-RUTF exerts its beneficial effects through mechanisms other than reducing intestinal permeability or altering the fecal 16S configuration.	This trial was funded by the Thrasher Research Fund and the Allen Foundation.
60	Infant gut microbiota characteristics generally do not modify effects of lipid-based nutrient supplementation on growth or inflammation: secondary analysis of a randomized controlled trial in Malawi.	Hughes et al, 2020	Yes	No disease studied.	The target population comprised pregnant women who came for antenatal care at any of the study clinics (one public district hospital (Mangochi), one semiprivate hospital (Malindi), and 2 public health centers (Lungwena and Namwera) in Mangochi District, southern Malawi. ) during the enrollment period.	Malawi	Rural	16S rRNA gene sequencing /Illumina MiSeq	Randomized, controlled, partially blinded, parallel-group clinical trial	488	Stool samples	6-18 months	Not indicated.	Not indicated.	Objective: To determine whether the infant microbiota modified the effects of a randomized controlled trial of lipid-based nutrient supplements (LNS) in Malawi on growth and inflammation at 12 and 18 months, respectively.	Iron and folic acid (IFA) during pregnancy only or multiple micronutrients (MMN).	No conclusive evidence of effect modification in this analysis, the relationships observed before correction for multiple hypothesis testing may be worth additional investigation. Specifically, further research on the potential of taxa such as Clostridium, Ruminococcus, Faecalibacterium, Streptococcus, and Firmicutes to modify the effects of nutrient supplementation on infant growth and inflammat…	Bill & Melinda Gates Foundation
115	Immunoglobulin recognition of fecal bacteria in stunted and non-stunted children: Findings from the Afribiota study	Huus et al, 2020	Yes	No disease studied.	Children aged 2–5 years living in Antananarivo, Madagascar, and in Bangui, Central African Republic.	Madagascar, and in Bangui	Not indicated.	16S rRNA gene sequencing/Illumina MiSeq using	Observational study	138	Stool samples	2-5 years	74/64	Not indicated.	Aim: To investigate whether chronic undernutrition and EED are also associated with altered Ig-recognition of the microbiota in children, using two geographically distinct populations from the Afribiota study.	None.	The data suggest that stunted children have a greater proportion of IgA-recognized fecal bacteria. We moreover identify two putative pathobionts, Haemophilus and Campylobacter, that are broadly targeted by intestinal IgA.	This research was supported by grants from the Canadian Institutes of Health Research (CIHR), the Bill and Melinda Gates Foundation and the Total Foundation.
1244	Gut microbiota related to Giardia duodenalis, Entamoeba spp. and Blastocystis hominis infections in humans from Côte d’Ivoire	Iebba et al, 2016	Yes	Giardia duodenalis, Entamoeba spp. and Blastocystis hominis infections. Infections are of public health significance as they can be associated with diarrheal disease.	20 people inhabiting three different localities of Côte d’Ivoire	Côte d’Ivoire	Rural	Quantitative polymerase chain reaction (qPCR)	Pre-liminary study	20	Stool samples	1- 74 years	14/6	Not indicated.	Aim: To highlight the relation of G. duodenalis, Entamoeba spp., and B. hominis infections with fecal microbiota composition in subjects living in southern Côte d’Ivoire.	None.	This preliminary investigation demonstrates a differential fecal microbiota structure in subjects infected with G. duodenalis or Entamoeba spp./B. hominis, paving the way for using further next-generation DNA technologies to better understand host-parasite-bacteria interactions, aimed at identifying potential indicators of microbiota changes.	Not indicated.
3393	Frequency of Firmicutes and Bacteroidetes in gut microbiota in obese and normal weight Egyptian children and adults	Ismail et al, 2011	Yes	Obesity. Not a disease of public health significance.	51 obese (23 children and 28 adults) individuals, and 28 subjects of normal weight (17 children and 11 adults).	Egypt	Not indicated.	Conventional PCR	Observational study	79	Stool samples	Not indicated.	Not indicated.	Not indicated.	Aim: To assess the differences in the composition of the intestinal microbiota between obese and normal weight Egyptian children and adults by comparing the Firmicutes and Bacteroidetes frequency in the stool and its correlation with high-sensitivity C-reactive protein (hsCRP), as a marker of inflammation, and also the correlation with the amount of dietary fat and carbohydrate intake.	None.	The results of this study indicate that obesity in Egyptian children and adults is associated with compositional changes in faecal microbiota with increase in the phyla Firmicutes and Bacteroidetes. This could be considered when developing strategies to control obesity and its associated diseases by modifying the gut microbiota.	Not indicated.
66	Evolution of the Gut Microbiome in HIV-Exposed Uninfected and Unexposed Infants during the First Year of Life.	Jackson et al, 2022	Yes	Human immunodeficiency virus (HIV). Disease of public health significance.	Mother-infant pairs: 123 with HIV-exposed uninfected infants (HEU) and 117 with HIV-uninfected infants (HUU), from South Africa. Women with and without HIV were recruited during labor at Chris Hani Baragwanath Hospital in Johannesburg, South Africa.	South Africa	Not indicated.	Pan-bacterial 16S rRNA gene sequencing/Illumina MiSeq platform	Longitudinal cohort	240 Mothers +240 Infants: 480	Stool samples/Rectal swabs.	Mothers- Interqurtile range: 22.0-34.5 years. Infants: 6-62 weeks.	Infants: 121/119	Not indicated.	Aim/objective: To report on the evolution of the gut microbiome in HEU in comparison with that in HUU during the first 62 weeks of life and the relationship of the maternal gut, breast milk, and infant gut microbiotas in a longitudinal cohort of 240 mother-infant dyads.	None.	The authors conclude that the gut microbiomes of HEU and HUU are heavily influenced by the maternal gut microbiome, whereas breast milk-associated microbes do not play an apparent, differentiating role. The microbiotas of HEU and HUU converged over time, mirroring the decrease in the excess of infectious morbidity and mortality in HEU.	This study was funded by the National Institute of Allergy and Infectious Diseases.
3158	Gut microbiome community composition is significantly influenced by shared living- space in rural agriculturalists from Burkina Faso	Jacobson et al, 2019	Yes	No disease studied.	120 individuals, stratified by age, sex, family, and multifamily "quartiers" (compounds) from a village in central Burkina Faso.	Burkina Faso	Village	rRNA V4 amplicon was sequencing	Observational study	120	Stool samples	Not indicated.	Not indicated.	Not indicated.	Not indicated.	None.	The study demonstrate that intra-village gut microbiome variation is driven primarily by sharing or lack thereof of quarfiers, providing a link between microbial ecological dynamics and living-space.	Not indicated.
170	Iron fortification adversely affects the gut microbiome, increases pathogen abundance and induces intestinal inflammation in Kenyan infants	Jaeggi et al, 2015	Yes	No disease studied.	Kenyan infants age of 5.5 months (±3 weeks) in the catchment area of the Kikoneni health centre.	Kenya	Rural	16S pyrosequencing and targeted real-time PCR (qPCR)	Double-blind randomised controlled trials	115	Stool samples	Only 6 month old infants	Not indicated.	Not indicated.	Aim: To determine the effects of two widely used high and low iron-containing dose micronutrient powder (+FeMNPs) on the gut microbiome, using barcoded 16S rRNA pyrosequencing and targeted real-time PCR (quantitative PCR, qPCR), and intestinal inflammation in Kenyan infants prone to diarrhoeal disease.	MNP with/without 2.5 mg iron as sodium iron EDTA OR MNPwith or without 12.5 mg iron as ferrous fumarate.	In the setting, provision of iron-containing MNPs to weaning infants adversely affects the gut microbiome, increasing pathogen abundance and causing intestinal inflammation. The study findings, together with others, suggest that, until safer formulations are available, +FeMNPs should be targeted to infants with IDA, while providing adequate protection from malaria and diarrhoea.	This project was supported by the Eunice Kennedy Shriver National Institute Of Child Health & Human Development and realised in collaboration with the INSTAPA Project, funded by the European Union’s Seventh Framework Programme.
1098	The association of gut microbiota characteristics in Malawian infants with growth and inflammation	Kamng'ona et al, 2019	Yes	No disease studied.	Malawian infants at 6 mo (n = 527), 12 mo (n = 632) and 18 mo (n = 629) of age.	Malawi	Not indicated.	16S rRNA gene amplicon sequencing/ Illumina MiSeq platform.	Observational/ longitudinal study	691	Stool samples	Mothers: Not indicated. Infants: 6-18 months.	Not indicated.	Not indicated.	Aim: To characterize gut microbiota from the stool samples of Malawian infants at 6 mo, 12 mo and 18 mo of age, as well as to investigate whether characteristics of the microbiota in infancy are associated with growth and inflammation.	None.	Microbiota diversity and maturity were related to growth in weight from 6 to 12 mo, but not to growth in length or head circumference or to growth from 12 to 18 mo. Microbiota diversity and maturity may also be linked to inflammation, but findings were inconsistent.	The study was funded by the Bill & Melinda gates Foundation.
56	Provision of Lipid-Based Nutrient Supplements to Mothers During Pregnancy and 6 Months Postpartum and to Their Infants from 6 to 18 Months Promotes Infant Gut Microbiota Diversity at 18 Months of Age but Not Microbiota Maturation in a Rural Malawian Setting: Secondary Outcomes of a Randomized Trial	Kamng'ona et al, 2020	Yes	No disease studied.	Mothers During Pregnancy and 6 Months Postpartum and Their Infants from 6 to 18 Months in a Rural Malawian Setting (2 hospitals and 2 health centers in a rural area in Mangochi district).	Malawi	Rural	Bacterial 16S rRNA gene sequencing/Illumina MiSeq platform	Randomized, controlled, partially blinded, parallel-group clinical trial	Mothers: 714. Children: 622	Stool samples	Children: 6-18 months.	Not indicated.	Not indicated.	Objective: To evaluate whether providing lipid-based nutrient supplements (LNSs) to mother–infant dyads promotes a more diverse and mature infant gut microbiota, compared to maternal supplementation with multiple micronutrients (MMN) or iron and folic acid (IFA).	Iron-folic acid [IFA; Nutrition Products South Africa (Pty) Ltd], multiple micronutrients [MMN; Nutrition Products South Africa (Pty) Ltd], and small-quantity lipid-based nutrient supplements (LNS; Nutriset S.A.S.).	The authors conclude that providing LNS to mothers during pregnancy and 6 months postpartum and to their infants from 6 to 18 months promotes infant gut microbiota diversity at 18 months, and that a persistent effect of the intervention 12 months post supplementation may be evident depending on the participants’ socioeconomic status. Their findings however did not support the hypothesis that LNS …	Bill & Melinda Gates Foundation
485	Gastrointestinal, vaginal, nasopharyngeal, and breast milk microbiota profiles and breast milk metabolomic changes in Gambian infants over the first two months of lactation: A prospective cohort study	Karampatsas et al, 2022	Yes	No disease studied.	One hundred and seven Gambian mothers and 35 healthy, vaginally delivered, exclusively breastfed infants.	Gambia	Urban	16S rRNA gene sequencing	Prospective cohort study	Mothers: 107. Infants: 35	Rectal swabs	Mothers: 18-45 years.	In infants: 18/17	Not indicated.	Aim/objectives: To characterize the gut and nasopharyngeal microbiome in healthy, vaginally delivered infants from the Gambia, together with the breast milk and rectovaginal microbiome of their mothers. In addition, authors assessed the metabolomic changes of breast milk over the first two months of life in the same cohort.	None.	This study’s results indicate that infant gut microbiota are unique bacterial communities, distinct from maternal gut and breast milk, respectively. These changes may contribute to the infant’s immunological, metabolic, and neurological development and could consist the basis for future interventions to correct disrupted early life microbial colonization.	This work was supported by a Welcome Trust Clinical Research Training Fellowship to KLD (WT2015) and the Thrasher Research Fund.
1112	Differences in Fecal Gut Microbiota, Short-Chain Fatty Acids and Bile Acids Link Colorectal Cancer Risk to Dietary Changes Associated with Urbanization Among Zimbabweans	Katsidzira et al, 2019	Yes	Colorectal Cancer (CRC). Disease is of public health significance.	Urban participants from Harare, the capital of Zimbabwe, and rural participants from a village in Murehwa district.	Zimbabwe	Urban and rural.	A microarray designated to the Human Gut Chip (HuGChip) was developed to analyze and compare human gut microbiota samples.	Exploratory study	20	Stool samples.	Not indicated.	2023-10-10	Not indicated.	Aim: To compare faecal microbiota composition and activity in 10 rural and 10 urban Zimbabweans for evidence of a differential CRC risk, as well as to compare diet, and faecal markers associated with CRC risk in the 20 healthy individuals.	None.	The gut microbiota composition and activity among rural and urban Zimbabweans retain significant homogeneity (possibly due to retention of dietary fiber), buturban residents have subtle changes, which may indicate a higher CRC risk.	This work was supported by NIH grants and a Mildred-Scheel-16 Scholarship by German Cancer Aid.
631	Differences in the Faecal Microbiome in Schistosoma haematobium Infected Children vs. Uninfected Children	Kay et al, 2015	Yes	Schistosoma haematobium Infection. Not a disease of public health significance.	Children recruited from crèches, early child development centres, pre-schools (typically for 3–5 years old) and local primary schools (for 6–10 years old), in the Murewa district in Zimbabwe in the Mashonaland East Province of Zimbabwe.	Zimbabwe	Not indicated.	16S rRNA gene sequencing/Illumina MiSeq platform	Observational/cross-sectional study	139	Stool samples	6 months-13 years	66/73	Not indicated.	Aims: To determine if there were differences in the structure (diversity and abundance) of the faecal microbiome between children infected with S. haematobium and uninfected children and to investigate the effects of PZQ treatment on the structure of the gut microbiome.	None.	The authors identified differences in the microbiome structure of schistosome infected vs. uninfected children, showing increased gut microbiome abundance and species diversity in infected children. Finally we demonstrated that the currently recommended antihelminthic treatment regimen does not alter the host gut microbiome structure when assessed 12 weeks post-treatment.	The investigation received financial support from the World Health Organization and The Wellcome Trust, and the Thrasher Research Fund.
681	Alteration of Gut Microbiota in Alzheimer’s Disease and Their Relation to the Cognitive Impairment	Khedr et al, 2022	Yes	Alzheimer’s Disease. It is a disease of public health significance.	25 cases with AD from Aswan University Hospital outpatient clinic, and 25 healthy volunteers matched by age, sex, and education.	Egypt	Rural	SYBR Green qPCR	Case-control study	50	Stool samples	53-84	28/22	Not indicated.	Aims: To assess the composition of different gut microbiota species in patients with AD and in healthy controls with matched age, sex, and education and correlate their microbiota abundance with clinical data and cognitive function. Objective: To investigate different species of gut microbiota in Egyptian patients with AD and correlate microbiota bacterial abundance with clinical data.	None.	The current work highlighted a significant relationship between AD and gut microbiota dysbiosis. It also revealed a significantly higher abundance of Akkermansia, Enterobacteria, Bacteroidetes, Bacillus cereus, Prevotella, and Clostridium cluster IV and a lower abundance of Bifidobacterium spp., Firmicutes, and Actinobacteria. Lactic acid bacteria and Prevotella were negatively correlated with co…	Not disclosed.
3045	THE GUT MICROBIOTA’S INFLUENCE IN THE DEVELOPMENT OF FOETAL ALCOHOL SPECTRUM DISORDERS	Kitchin et al, 2021	Yes	Foetal Alcohol Spectrum Disorders. Diseases are not of public health significance.	Pregnant women were recruited from antenatal clinics in Robertson and Wellington in the Western Cape of South Africa.	South Africa	Not indicated.	16S ribosomal RNA V1-V2 hypervariable region sequencing	Observational study	211	Stool samples	Not indicated.	Not indicated.	Not indicated.	Aim: To compare the gut microbial composition of infants diagnosed with and without FASD.	None.	The findings are promising for microbe-based therapeutic interventions to reduce the extent of neurocognitive deficits and the debilitating symptoms associated with FASD. Additionally, identification of a gut microbial signature associated with FASD will hopefully lead to the development of a FASD predictor allowing for early identification of FASD cases which may facilitate maternal- and infant-…	Not indicated.
141	Blastocystis Colonization Is Associated with Increased Diversity and Altered Gut Bacterial Communities in Healthy Malian Children	Kodio et al, 2019	Yes	No disease studied.	Children aged 6 months to 15 years who are part of a cohort study on malaria incidence conducted at the Bandiagara Malaria Project (BMP) clinical research center in Bandiagara, Mali.	Mali	Not indicated.	16S rDNA gene sequencing/ Illumina MiSeq	Cross-sectional study	300	Stool samples	6 months- 15 years	154/146	Not indicated.	Aim: To assess the influence of Blastocystis colonization on gut bacterial communities in healthy Malian children.	None.	Blastocystis colonization was significantly associated with a higher diversity and richness of the gut bacterial communities in healthy children. Also, Blastocystis colonization was associated with a higher proportion of “beneficial bacteria” (Firmicutes and Bacteroides) than “probable pathogenic bacteria” (Proteobacteria) in the human gut.	This study was supported by funding from the IHU-Mediterranean Infection Foundation and the MARCAD DELTAS Africa Initiative grant DEL-15-10.
37	A Prospective Study on Child Morbidity and Gut Microbiota in Rural Malawi.	Kortekangas et al, 2019	Yes	No disease studied.	631 Children in a randomized-controlled nutrition intervention trial- the iLiNS-DYAD trial was a randomized, controlled, and partly blinded clinical trial conducted in the Mangochi district in southern Malawi.	Malawi	Rural	16S rRNA sequencing/ Illumina MiSeq instrument	Prospective study	631	Stool samples	6-30 months	Not indicated.	Not indicated.	Aims: To investigate whether the prevalence of common childhood infections predicts gut microbiota composition in children, and to further assess whether the gut microbiota is associated with subsequent morbidity.	Childhood infections and subsequent morbidity.	Study results suggest that in the studied rural Malawian setting, diarrhea from 11 to 12 months of age is predictive of lower levels of microbiota maturity at 12 months, respiratory symptoms from 11 to 12 months of age are predictive of higher levels of microbiota diversity at 12 months, and higher levels of microbiota maturity and diversity at 6 months may be associated with a lower subsequent i…	Not indicated.
25	Environmental exposures and child and maternal gut microbiota in rural Malawi.	Kortekangas et al, 2020	Yes	No disease studied.	631 children and mothers participating in a nutrition intervention trial, the iLiNS‐DYAD trial in Malawi.	Malawi	Rural and Semi-urnban.	16S rRNA sequencing	Sub-study of a randomized, controlled, and partly blinded clinical trial	631	Stool samples	Children: 1-30 months.	Not indicated.	Not indicated.	Aim/Objective: To investigate whether gut microbiota composition in young children and their mothers is associated with different environmental exposures in rural Malawi.	Environmental exposures: Socio‐economic status, water source, sanitary facility, domestic animals, maternal characteristics, season, antibiotic use, and delivery mode.	The study findings, together with those from others, suggest that environmental factors in the environment do have an impact on gut microbiota composition, but that there is great contextual variation in this association. In this study in a rural Malawian setting, environmental exposures were associated with several subtle aspects of microbiota composition, but we did not find consistent associat…	This study was supported in part by a grant to the University of California Davis from the Bill & Melinda Gates Foundation.
269	Associations between Gut Microbiota and Intestinal Inflammation, Permeability and Damage in Young Malawian Children	Kortekangas et al, 2022	Yes	No disease studied.	Children of women who participated in the iLiNS-DYAD trial, a randomized, controlled, and partly blinded clinical trial conducted in the Mangochi district in southern Malawi.	Malawi	Rural	16S rRNA sequencing/ Illumina MiSeq instrument	Observational study/Cross-sectional	611	Stool samples	6-30 months	Not indicated.	Not indicated.	Aims: To investigate how the gut microbiota is associated with markers of intestinal inflammation, permeability and damage (EED biomarkers) in rural Malawian children at 6, 18 and 30 months of age. To conduct secondary exploratory analyses on associations of beta diversity and taxon-level microbiota composition with EED biomarkers.	None.	The study findings support the hypothesis of an association between the gut microbiota composition and EED assessed by the biomarkers calprotectin, alpha-1 antitrypsin and REG1B in rural Malawian children. EED was found to be associated with reduced microbiota diversity and maturity and relative abundances of potentially pathogenic and oral bacterial taxa.	This work was supported in part by the Finnish Funding Agency for Technology and Innovation; and a personal grant by the Pediatric Research Foundation in Finland to EK.
54	Dysbiosis Signatures of Fecal Microbiota in South African Infants with Respiratory, Gastrointestinal, and Other Diseases.	Krishnamoorthy et al, 2020	Yes	Respiratory: Pneumonia*, Lower respiratory tract infection*, Pneumonia meningitis*, Bronchiolitis*, Pulmonary tuberculosis*, Lobar pneumonia*, Tuberculous meningitis*. Gastrointestinal: Acute gastroenteritis, Abdominal obstruction, Diarrhea*. Other Diseases/conditions: Severe acute malnutrition, Anemia, Trabeculotomy, Congenital strabismus, Cardiomegaly, Failure to thrive. * = Diseases are of pub…	Thirty-four South African infants hospitalized for respiratory, gastrointestinal and other diseases, recruited at the Cecilia Makiwane Hospital, East London, South Africa.	South Africa	Not indicated.	16s rRNA amplicon sequencing/ Illumina Miseq sequencing platform	Case-control study	34	Stool samples	Not indicated.	17/17	Not indicated.	Aim: To identify and compare the fecal microbiome of 34 hospitalized South African infants diagnosed with respiratory disease, gastrointestinal disease, and other diseases using the 16s rRNA amplicon sequencing and quantitative insights into microbial ecology (QIIME) package. Objective: To determine the association between the fecal microbiota diversity of the infants with different disease condi…	Vitamin A supplementation, antibiotic, and deworming therapies.	The authors showed potential links between the fecal microbiota and clinical parameters, disease-based signature microbiota, and the marker pathogens. Although the causal assumptions remain premature, the identification of fecal microbiota, the dominant phylum (Firmicutes, Proteobacteria, Actinobacteria, and Bacteroidetes) and pathogens with the previous medical history of the pediatric patients …	Not indicated.
77	Gut Microbiota in Children Hospitalized with Oedematous and Non-Oedematous Severe Acute Malnutrition in Uganda	Kristensen et al, 2016	Yes	No disease studied.	A subsample of children who were included in the observational study FeedSAM. The children were aged 6–59 months and were admitted for treatment of Severe Acute Malnutrition (SAM), at the Mwanamugimu Nutrition Unit (MNU), Mulago Hospital, Kampala, Uganda.	Uganda	Not indicated.	16S rRNA gene tag-encoded amplicon sequencing/MiSeq (Illumina)	Observational study	87	Stool samples	6–24 months	30/57	Not indicated.	Aim: To assess whether GM composition differed between Ugandan children suffering from either oedematous or non-oedematous malnutrition.	None.	The authors found that non-oedematous SAM children have lower GM diversity compared to oedematous SAM children, but no clear compositional differences were found between the two groups of children.	This work was funded by: Knud Højgaards Foundation (KHSK), Oticon Foundation (KHSK), Arvid Nilssons Foundation (HF), Aase and Ejnar Danielsens Foundation (MJHR), Brødrene Hartmanns Foundation (MJHR), Augustinus Foundation (HF), Axel Muusfeldts Foundation (HF), Torkild Steenbecks Legat (HF), and The Danish Free Research Council (MW).
2998	EARLY ANTIRETROVIRAL THERAPY IN NEONATES AND MATURATION OF THE GUT MICROBIOME	Kuhn et al, 2022	Yes	Human immunodeficiency virus (HIV). Disease is of public health significance.	79 infants (39 female) with intrauterine HIV infection diagnosed <48 hours of birth and 71 uninfected infants (37 female) born to women living with HIV.	South Africa	Not indicated.	16S rRNA gene sequencing	Observational study	150	Rectal swab samples	4- 24 weeks	79/74	Not indicated.	Objective: To investigate whether breastfeeding and early ART mitigate harmful influences of intrauterine HIV infection on the developing infant microbiome.	None.	There are detectable benefits associated with breastfeeding in conjunction with early ART in maintaining a more Bifidobacteria-rich microbiota profile in infants with HIV. However, persisting shifts in the microbiota profile despite early ART, even among breast-fed infants, support the need for complementary interventions to strengthen early ART and improve outcomes.	The study was supported in part by the Eunice Kennedy Shriver National Institute of Child Health and Human Development/National Institute of Allergy and Infectious Disease, National Institutes of Health, the South African National HIV Programme and South African Research Chairs Initiative of the Department of Science and Innovation and National Research Foundation of South Africa.
1014	Response of the human gut and saliva microbiome to urbanization in cameroon	Lokmer et al, 2020	Yes	No disease studied.	147 adult volunteers at three locations in Cameroon, representing an urbanization gradient: 81 individuals in Ngoantet (rural), 34 in Mbalmayo (semi-urban) and 32 in Yaoundé (urban).	Cameroon	Rural, semi-urban and an urban.	16S rRNA gene amplicon sequencing/ Illumina MiSeq	Observational study	147	Stool samples	18- 65 years	Not indicated.	Not indicated.	Aim: To examine the effect of urbanization on the gut and saliva microbiomes and to identify the factors associated with their variation in a less industrialized setting.	None.	In conclusion, urbanization was associated with minor shifts in diversity of the gut and saliva microbiome, but also with changes in the gut microbiome composition that were reminiscent of those associated with industrialization. Although some of the important factors shaping the gut microbiome, such as stool consistency and diet, are the same as in industrialized populations, gut eukaryotes (Ent…	This work was supported by an ANR grant, a CNRS INEE grant as well as grants from the Center for Microbiome Informatics and Therapeutics at MIT and the Rasmussen Family Foundation to the Global Microbiome Conservancy.
188	HIGHER FIBER COMPLEMENTARY FOOD ALTERS FECAL MICROBIOTA COMPOSITION AND NORMALIZES STOOL FORM IN MALAWIAN CHILDREN: A RANDOMIZED TRIAL.	Lungu et al, 2021	Yes	No disease studied.	Mother-child pairs in a rural hospital catchment area in Lilongwe district of Malawi.	Malawi	Rural	Real-Time polymerase chain reaction (PCR) for microbes of interest and 16S rRNA gene amplicon sequencing.	Parallel, single-blinded, intervention study.	79	Stool samples	Children: 6-36 months	42/37	Not indicated.	Objective: To assess the feasibility and acceptability of a soybean, soy hull fiber, and maize (SFM) blend porridge in children aged 6 to 36 months living in Lilongwe district of rural Malawi.	Soybean, soy hull fiber, and maize (SFM) blend food.	The results of this trial confirm the acceptability and feasibility of a porridge blend of soybean, maize, and soy hull fibre. In young Malawian children, feeding a blend of soybean, soy hulls and maize reduced diarrhea-type stools and increased the abundance of Akkermansia muciniphila, a bacterial species involved in maintaining intestinal health, and thus may provide a feasible means of improvi…	This study was supported by the United States Agency for International Development (USAID), as part of the Feed the Future initiative, under the CGIAR Fund.
985	Atopic dermatitis and food sensitization in South African toddlers: Role of fiber and gut microbiota	Mahdavinia et al, 2017	Yes	Atopic dermatitis and food sensitization. Both conditions are not of public health significance.	Young black African children aged 12 to 36 months old with and without AD living in the same community in Cape Town, South Africa.	South Africa	Not indicated.	Next-generation sequencing/ Illumina MiSeq	Observational/ cross-sectional study	38	Stool samples	12- 36 months	16/22	Black Africans	Aim: To examine whether toddlers with AD and control toddlers from Cape Town have different microbiomes in terms of bacterial richness and diversity as well as to investigate the differences in the relative abundance for different operational taxonomic units between the 2 groups.	None.	This pilot study found no major differences in the composition of the gut microbiota of 12- to 36-month-old children with and without AD. This lack of association of changes in the gut microbiota with AD could be attributable to the small sample size.	This research is supported by a junior investigator grant from Brinson Foundation, a Cohn Scholarship from the Rush University Mentoring Office and by grants from the National Institutes of Health.
1146	Effects of diet on the childhood gut microbiome and its implications for atopic dermatitis	Mahdavinia et al, 2019	Yes	Atopic dermatitis. Disease is not of public health significance.	Patients with AD recruited from the Nelson Mandela Academic Hospital in the Eastern Cape, and control (nonallergic, non–food-sensitized) subjects recruited from randomly selected creches in the Cape Town metropole.	South Africa	Rural	16S rRNA gene sequencing/ Illumina MiSeq sequencing platform	Cross-sectional study	83	Stool samples	Not indicated.	37/46	Blacks (Xhosa)	Aim: To characterize gut microbiotas of black South African (Xhosa) children from the remote rural Mqanduli district of the Eastern Cape in association with AD.	None.	Here, the authors have identified 2 species of bacteria that seem to be linked to AD and diet, and can explain some of the unsolved chain of events in the pathogenesis of this condition. However, much research is needed to uncover the whole story behind this major increase in allergic diseases and the huge impact it has around the globe.	This work is supported by a research grant from the Brinson Foundation and the Medical Research Council of South Africa, a Cohn research scholarship from Rush University and the National Institutes of Health.
3479	Exploring the relationship between the gut microbiome and mental health outcomes in a posttraumatic stress disorder cohort relative to trauma-exposed controls	Malan-Muller et al, 2022	Yes	Posttraumatic stress disorder. Disorder is not of public health significance.	18 years and older, South African mixed ancestry/South African Coloured (SAC) population (i.e. individuals with PTSD (n = 79) and trauma-exposed controls (TECs) (n = 58)).	South Africa	Not indicated.	16S ribosomal RNA gene V4 amplicon sequencing/ Illumina MiSeq platform	Case-control study	137	Stool samples	Not indicated.	110/27	South African mixed ancestry/South African Coloured	Aim: To build on the authors' previous results by investigating the diversity and microbial community composition of the gut microbiome in a cohort of well-characterized South African individuals with PTSD and TECs, and, secondly, to identify relevant psychiatric-related variables (such as trauma exposure, comorbid psychiatric conditions and psychotropic medication use) that might associate with …	None.	The authors identified a consortium of four genera, Mitsuokella, Odoribacter, Catenibacterium and Olsenella, possessing a moderate ability to discriminate between PTSD and TEC participants. The summed relative abundance of these genera was higher in individuals with PTSD compared to TEC and was positively correlated with PTSD severity and childhood trauma severity.	This research was supported by the South African Medical Research Council (SAMRC) for the “Shared Roots” Flagship Project through funding received from the South African National Treasury under its Economic Competitiveness and Support Package.
61	Longitudinal Analysis of Infant Stool Bacteria Communities Before and After Acute Febrile Malaria and Artemether-Lumefantrine Treatment.	Mandal et al, 2019	Yes	Acute Febrile Malaria. Disease is of public health significance.	100 infants residing within one contiguous 26x13km zone comprising 12 villages in Kilifi County, Kenya, who were observed from 14 days of birth until nine months of age.	Kenya	Village/rural	16S ribosomal ribonucleic acid gene (V3–V4 region) sequencing.	Longitudinal study	100	Stool samples	14 days of birth- 9 months of age	Not indicated.	Not indicated.	Objective: To assess to what degree Plasmodium infection, or antimalarial treatment, in humans induces gut bacteria dysbiosis that may contribute to enteric bacteria progressing to systemic infections.	Plasmodium infection or antimalarial treatment (AL).	In-depth bioinformatics analysis of stool bacteria has revealed for the first time that human malaria episode/AL treatment have minimal effects on gut microbiota in Kenyan infants. The results of the study suggest that changes in the inflammatory nature of intestinal tissue, in contrast to gut microbiota dysbiosis, during malaria may contribute to translocation of enteric bacteria and progression…	Sample collection was funded by the Wellcome Trust. Laboratory work, data analysis and write-up were supported by funds from the University of Louisville and the National Institutes of Health.
469	Metabolic derangements identified through untargeted metabolomics in a cross-sectional study of Nigerian children with severe acute malnutrition	McMillan et al, 2017	Yes	No disease studied.	58 Children (47 with SAM and 11 well-nourished hospital controls) aged 6–48 months admitted to a health facility in a region with endemic malnutrition (The Federal Medical Centre, Gusau, Zamfara State, Nigeria).	Nigeria	Rural and Urban.	16S rRNA gene sequencing/ Illumina Mi-Seq	Cross-sectional	58	Stool samples	6–48 months	Not indicated.	Not indicated.	Aims: To identify conserved changes in the metabolome of children with SAM compared to controls in order to improve the understanding of the pathophysiology of malnutrition. To also measure biomarkers of intestinal inflammation and profile the gut microbiota of the children. Objectives: To elucidate the metabolic consequences of SAM and whether these changes are associated with changes in gut mic…	None.	The plasma metabolome discriminated children with SAM from controls, while no significant differences were observed in the microbial or small molecule composition of stool.	Not indicated.
83	Molecular characterization of the gut microbiome in egyptian patients with remitting relapsing multiple sclerosis	Mekky et al, 2022	Yes	Multiple sclerosis (MS). Not a disease of public health significance.	Thirty MS Egyptian cases, who presented to the MS Clinic of Alexandria University Hospital within the time from September 2018 to September 2019, as well as a control group of twenty healthy subjects of similar age and sex, mainly from the relatives of other patients visiting the department outpatient clinic.	Egypt	Not indicated.	Quantitative SYBR Green Real Time PCR assay.	Comparative study	50	Stool samples	23-40 years	27/23	Not indicated.	Aim: To identify the gut microbiome in Egyptian patients,that are likely related to MS as well as their possible role in the susceptibility to MS and in the course of the disease.	None.	The overall results of our study agree with previous studies, the Egyptian patients with Multiple Sclerosis exhibit microbial dysbiosis. However, the results of individual bacteria may differ. Multiple Sclerosis patients have significantly higher B. fragilis. Although the level of Prevotella, Lactobacilli and C. perfringes appear much less in MS patients than the control, the difference is not st…	Not funding was received for the study.
840	Vitamin D and Phenylbutyrate Supplementation Does Not Modulate Gut Derived Immune Activation in HIV-1.	Missailidis et al, 2019	Yes	Human Immunodeficiency Virus-1 (HIV-1). Disease is of public health significance.	ART-naïve HIV-positive individuals > 18 years, CD4+ T cells counts > 350 cells/mL, and plasma viral loads > 1000 copies/mL, attending the ART clinic, Department of Internal Medicine, Black Lion University Hospital in Addis Ababa.	Ethiopia	Not indicated.	16S rRNA gene sequencing/ Illumina MiSeq	Randomized, double-blind, placebo-controlled, clinical trial.	167	Mucosal gut tissue biopsies	Not indicated.	132/35	Not indicated.	Aim: To investigate if nutritional supplementation with vitamin D and phenylbutyrate could improve gut-derived inflammation, selected microbial metabolites, and composition of the gut microbiota.	Vitamin D and phenylbutyrate supplements.	Nutritional supplementation with vitamin D + phenylbutyrate did not modulate gut-derived inflammatory markers or microbial composition in treatment-naïve HIV-1 individuals with active viral replication.	This research was funded by the Swedish Contingency Agency (MSB) and the Swedish International Development Agency (Sida), the Swedish Research Council , and the Swedish Heart and Lung Foundation (HLF).
26	Gut microbiota signature of pathogen-dependent dysbiosis in viral gastroenteritis.	Mizutani et al, 2021	Yes	Viral gastroenteritis. Not disease of public health significance.	80 patients (49 adults, > 19 years old), 13 adolescents (10–19 years old), and 18 children (< 10 years old) attending the Ga West Municipal Hospital, Greater Accra Region, Ghana with diarrhea symptoms, as well as 34 healthy individuals resident in the Eastern Region of Ghana were recruited as controls.	Ghana	Not indicated.	16S rRNA gene sequencing/ Illumina MiSeq	Comparative study	114	Stool samples	13 adolescents: 10–19 years old. Adults and children range not indicated.	For patients/cases: 48/32.	Not indicated.	Aims/Objectives: To examine the profile of gut microbiota during diarrheal episodes caused by viral or non-viral etiological agents in patients (adults, adolescent and children) in Ghana. To further evaluate the differences in the gut microbiota communities between enterovirus-positive and enterovirus-negative diarrheic stool samples.	None.	This comparative study of diarrheal pathogens in Ghana revealed specific trends in the gut microbiota signature associated with diarrhea and that pathogen-dependent dysbiosis occurred in viral gastroenteritis. The study data also revealed that several bacterial taxa with potential pathogenesis, such as Escherichia-Shigella and Klebsiella, are part of healthy commensal microbiota in Ghanaian indiv…	This study was supported by AMED-JICA (the Science and Technology Research Partnership for Sustainable Development).
970	Altered Virome and Bacterial Microbiome in Human Immunodeficiency Virus-Associated Acquired Immunodeficiency Syndrome	Monaco et al, 2016	Yes	HIV. Study is of public health significance.	Eighty-two HIV-infected Ugandan subjects (40 HIV-infected subjects on ART treatment and 42 HIV-infected ART-naïve subjects), forming part of the Uganda AIDS Rural Treatment Outcomes (UARTO) study at the Immune Suppression Syndrome Clinic at Mbarara Regional Referral Hospital, as well as 40 HIV-negative subjects from the HIV testing clinic after a negative HIV test result.	Uganda	Rural	16S rRNA sequencing/ Illumina MiSeq platform	Observational study	122	Stool samples	Not indicated.	71/51	Not indicated.	Aim: To characterize the enteric virome and bacterial microbiome in a cohort of Ugandan patients, including HIV-uninfected or HIV-infected subjects and those either treated with anti-retroviral therapy (ART) or untreated.	None.	Together, the studies indicate that severe immunodeficiency is likely the mechanism leading to changes in the fecal microbiome, including bacteria and viruses, and that immune reconstitution, such as through early ART, may restore the healthy enteric microbiome.	The study was supported by a number of funding bodies such as NIH training grants, a medical student research supplement to training grant and the Harvard Center for AIDS Research.
272	Parasites and diet as main drivers of the Malagasy gut microbiome richness and function	Mondot et al, 2021	Yes	No disease studied.	219 Malagasy individuals, either healthy volunteers or patients hospitalized in the gastroenterology department of the university hospital PZaGa of Mahajanga, North-West Madagascar.	Madagascar	City and Rural.	16S rRNA gene sequencing/ MiSeq device.	Observational study	219	Stool samples	Not indicated.	Not indicated.	Not indicated.	Objectives: To describe the gut microbiota composition of individuals living in Madagascar, (2) identify potential associations between gut bacterial taxa and parasites colonizing the digestive tract and (3) highlight main determinants of the gut microbiota composition in this developing country.	Diet	Diet and protozoan carriage were the main drivers of microbiota composition. High protozoan carriage was associated with higher diversity, richness and microbial functionalities. The gut microbiome of Malagasy strongly differs from that of Westernized countries. Asymptomatic protozoan carriage and dietary habits are the external factors with the deepest impact on gut microbiome.	Not indicated.
983	Variation in Rural African Gut Microbiota Is Strongly Correlated with Colonization by Entamoeba and Subsistence	Morton et al, 2015	Yes	No disease studied.	64 adult volunteers (26 females and 38 males) in seven rural villages (Bidou, Makouré, Bandevouri, Ndtoua, Afan Essokié, Akak and Ebodié) in Southern Cameroon.	Cameroon	Rural	16S rRNA gene sequencing/ Illumina MiSeq instrument	Observational study	64	Stool samples	26- 78 years	26/38	Not indicated.	Objective: To better understand the relative influence of diet, host genetics, and parasitism on human gut microbiota composition and structure.	None.	This study suggests an important role for eukaryotic gut inhabitants and the potential for feedbacks between helminths, protozoa, microbes, and the host immune response, one that has been largely overlooked in studies of the microbiome. In addition, the results highlight the substantial variability in gut microbiome composition among closely related populations.	This work was funded by the Howard Hughes Medical Institute (HHMI) and the French National Agency for Research.
1091	Interactions between fecal gut microbiome, enteric pathogens, and energy regulating hormones among acutely malnourished rural Gambian children	Nabwera et al, 2021	Yes	Acute malnutrition. Disease is not of public health signifcance.	Children under 5 years of age in the East, West, and Central Kiang districts of rural Gambia.	Gambia	Rural	16S rRNA sequencing/ Illumina MiSeq System	Cross-sectional observational sub-study of a quasi-experimental study.	60	Stool samples	6- 24 months	29/31	Not indicated.	Aim: To investigate the interactions between the gut microbiome, enteric pathogens, and energy regulating hormones among rural Gambian children with non-edematous SAM during outpatient nutritional rehabilitation and MAM relative to well-nourished children.	None.	The study findings suggest that marasmus SAM is characterized by the collapse of a complex system with nested interactions and key associations between the gut microbiome, enteric pathogens, and energy regulating hormones.	The work was supported by the UK Medical Research Council and the UK Department for International Development (DFID) under the MRC/DFID Concordat agreement; Bill and Melinda Gates Foundation and the National Institute of Medical Research (NIMR), UK. This network analysis was supported by NIH.
1968	Anaerobe-enriched gut microbiota predicts pro-inflammatory responses in pulmonary tuberculosis	Naidoo et al, 2021	Yes	Pulmonary tuberculosis. Disease is of public health significance.	Adult presumptive TB patients (≥ 18 years) self-presenting to a primary healthcare facility in Cape Town, South Africa (12 April 2016–24 July 2017) for investigation and not on TB treatment within the last two months.	South Africa	Not indicated.	16S rRNA gene sequencing/ Illumina MiSeq	Cross-sectional study	105	Stool samples	Not indicated.	47/58	Black and Mixed ancestry	Aims/objectives: To comprehensively characterise the microbiome and host immune system in TB patients from a high burden setting. To evaluate oral, sputum and gut microbiota in TB cases, comparing them to symptomatic controls, and close contacts.	None.	TB-specific microbial relationships were identified in oral washes, induced sputum, and stool from cases before the confounding effects of antibiotics. Specific anaerobes in cases’ stool predict upregulation of pro-inflammatory immunological pathways, supporting the gut microbiota's role in TB.	European & Developing Countries Clinical Trials Partnership, South African-Medical Research Council, National Institute of Allergy and Infectious Diseases.
73	Patients infected with Mycobacterium africanum versus Mycobacterium tuberculosis possess distinct intestinal microbiota.	Namasivayam et al, 2020	Yes	Tuberculosis (TB). Disease is of public health significance.	Adult individuals (≥18 years of age) with active pulmonary TB (defined by positive sputum culture) and healthy volunteers (controls) prospectively recruited on a rolling basis over a two-year time period at the Point-G University Teaching Hospital of Bamako, in Mali.	Mali	Inner-city or suburban	16S rRNA sequencing/ Illumina MiSeq	A longitudinal, clinical study	51	Stool samples	18-75 years	12/39	Not indicated.	Aim: To characterize and compare the intestinal microbiomes of patients with MAF or MTB infections before and during ATT in Mali, West Africa.	None.	MAF participants have distinct microbiomes compared with MTB patients, displaying decreased diversity and increases in Enterobacteriaceae with respect to healthy participants not observed in the latter patient group. Interestingly, this observed elevation in Enterobacteriaceae positively correlated with enhanced inflammatory gene expression in peripheral blood and was reversed after initiation of…	This work was supported by the grants from the National Institutes of Health, as well as the Intramural Research Program of the National Institute of Allergy and Infectious Diseases.
2209	Association of maternal prenatal psychological stressors and distress with maternal and early infant faecal bacterial profile	Naudé et al, 2020	Yes	No disease studied.	84 mothers from two low socioeconomic communities, TC Newman and Mbekweni in a peri-urban area outside Cape Town, South Africa and 101 infants at birth in a South African birth cohort study.	South Africa	Peri-urban	16S ribosomal ribonucleic acid (rRNA) gene sequencing/ Illumina MiSeq platform.	Longitudinal study	185	Stool samples	Not indicated.	Infants: 58/43	Not indicated.	Aims: The primary aim of this study was to determine the association between different profiles of maternal prenatal stressors and distress (including IPV, psychological distress, depression, and PTSD) experienced by South African mothers and the development of infants’ faecal microbiome early in life. The secondary aim included the investigation of the relationship of these prenatal psychologica…	None.	Maternal prenatal exposure to intimate partner violence (IPV) is associated with differences in faecal bacterial profiles of mothers at delivery (Lactobacillaceae and Peptostreptococcaceae) and of their infants at birth (family Enterobacteriaceae) and 4-12 weeks of age (genus Weissella). These infants had increased proportions of taxa within the family Enterobacteriaceae (Citrobacter; OTU 101; OT…	The Drakenstein Child Health Study, is funded by Bill and Melinda Gates Foundation (OPP1017641; OPP1017579). This study was also supported by an H3Africa U01 award from the National Institutes of Health of the USA to MPN and HJZ (1U01AI110466-01A1).
266	Dynamics of the Gut Microbiome in Shigella-Infected Children during the First Two Years of Life.	Ndungo et al, 2022	Yes	Shigella Infection. Disease falls under Diarrhoeal diseases, and is therefore a condition of public health significance.	A cohort of children from birth to 2 years of age and mothers enrolled in a longitudinal malaria surveillance study in Malawi, at Mfera Health Clinic in Chikwawa, Malawi.	Malawi	Not indicated.	16S rRNA amplicon sequencing	Longitudinal study	60	Rectal swabs	Children: 0-2 years. Mothers: 17-45 years.	30/30	Not indicated.	Aim: To characterize the gastrointestinal microbiota in a longitudinal birth cohort from Malawi that was monitored for Shigella infection, using 16S rRNA amplicon sequencing.	None.	The study demonstrated that Shigella infection did not profoundly impact overall species diversity but led to the expansion of species known to improve gastrointestinal health and drive the microbiota back to homeostasis.	This work was supported by the National Institutes of Health awards, as well as by Research Supplement to Promote Diversity in Health-Related Research awards. The sequencing costs were subsidized by the University of Maryland, Baltimore, Institute for Clinical & Translational Research and by the National Center for Advancing Translational Sciences (NCATS) Clinical Translational Science Award (CTS…
1019	Association between clinical and environmental factors and the gut microbiota profiles in young South African children	Nel Van Zyl et al, 2021	Yes	No disease studied.	Young children recruited from urban communities (often living in over-crowded and/or informal housing conditions) in the Cape Town metropolitan area (Western Cape, South Africa) which has a population of 4 million people.	South Africa	Urban	16S rRNA gene amplicon sequencing/ Illumina MiSeq platform	Sub-study/ study nested in an ongoing phase III, cluster randomised, double-blinded, placebo-controlled tuberculosis child multidrug-resistant preventive therapy (TB-CHAMP) trial.	115	Stool samples	0- 5 years	55/60	Not indicated.	Aim: To characterize the bacterial gut microbiota profiles of children below 5 years of age living in urban Cape Town communities.	None.	In this strudy, Prevotella was the most common genus identified in the participants, and after infancy, the gut bacteria were dominated by Firmicutes and Bacteroidetes. In this setting, children exposed to antibiotics and indoor cooking fires were at the most risk for dysbiosis, showing significant losses in gut bacterial diversity.	This study was supported by Grants funded through the NHLS Research Trust of South Africa and the Harry Crossley Foundation.
74	Rectal microbiota among HIV-uninfected, untreated HIV, and treated HIV-infected in Nigeria.	Nowak et al, 2017	Yes	Human immunodeficiency virus (HIV). Disease is of public health significance.	130 men who have sex with men (MSM), 55 HIV-uninfected, 41 untreated HIV, 34 ART-treated HIV, in Abuja, Nigeria.	Nigeria	Not indicated.	Bacterial 16S rRNA gene sequencing/ Illumina MiSeq platform	Cross-sectional study	130	Rectal swabs	Not indicated.	Men only.	Not indicated.	Objective: To compare/evaluate the composition of the rectal microbiota among three groups of men who have sex with men(MSM): HIV-uninfected, untreated HIV, and ART-treated HIV-infected.	HIV treatment	In summary, there were subtle shifts in the rectal microbiota among HIV-positive individuals receiving treatment, including a decrease in diversity of the Bacteroidetes phylum driven primarily by a loss in Prevotella. There was a shift towards more pathogenic bacteria. Untreated HIV infection does not significantly alter the rectal microbiota, whereas prior treatment is associated with a shift to…	The research was supported by seed funding from MPower and salary support from UMGCC P30 grant from the National Cancer Institute. Additional support has been provided by the U.S National Institutes of Health, the U.S. Military HIV Research Program, Fogarty AITRP, and the President's Emergency Plan for AIDS Relief through cooperative agreement U2G IPS000651 from the HHS/Centers for Disease Contro…
874	A signature of Prevotella copri and Faecalibacterium prausnitzii depletion, and a link with bacterial glutamate degradation in the Kenyan colorectal cancer patients	Obuya et al, 2022	Yes	Colorectal cancer (CRC). Disease is of public health significance.	18 CRC patients attending a colonoscopy outpatient clinic at Moi Teaching and Referral Hospital in Kenya, and 18 Kenyan healthy volunteers.	Kenya	Not indicated.	16S rRNA sequencing/ Illumina MiSeq platform	Cross-sectional observational study	36	Colonic tissues	Not indicated.	15/21	Not indicated.	Objective: To establish the tumor microbiome profile of Kenyan CRC patients relative to the healthy population.	None.	Microbiome and microbial metabolic profiles of CRC patients are different from those of healthy individuals. CRC microbiome dysbiosis, particularly P. copri and F. prausnitzii depletion and glutamate metabolic alterations, are evident in Kenyan CRC patients.	These studies were partly supported by funding from the AMPATH and Moi Teaching and Referral Hospital, Kenya and by institutional funds (Department of Pathology and School of Medicine of the University of Alabama at Birmingham, UAB). This article is also derived from the Subject Data funded in part by USAID and National Academy of Science (NAS) through sub-award, and Science and Technology Develo…
41	Gut microbiome profiling of a rural an durban South African cohort reveals biomarkers of a population in lifestyle transition	Oduaran et al, 2020	Yes	No disease studied.	70 participant from Bushbuckridge: 119, Soweto: 51, South Africa.	South Africa	Rural and urban	16S rRNA gene sequencing/ Illumina MiSeq platform	Pilot exploratory study	170	Stool samples	43–72 years	Females only.	Not indicated.	Aims: To characterize the microbiome of African adults living in more mainstream lifestyle settings and investigate associations between the microbiome and obesity.	Lifestyle practices, e.g. Diet and sedendary lifestyle.	In broad summary, the compositional taxa of the gut microbiome of the collective ethnolinguistic groups in the cohorts are reflective of an epidemiologically transitional state, and the beneficial or detrimental effects of Prevotella are very likely diet- and lifestyle-dependent. Moreover, the authors specifically found that geographical location was more important for sample clustering than lean…	This project was funded with a grant from the African Partnership for Disease Control, the South African National Research Foundation, the National Human Genome Research Institute as part of the H3A Consortium, the Rosenkranz Prize, a Stanford Center for Innovation in Global Health seed award, a Fogarty Global Health Equity Scholar award, the Center for Computational, Evolutionary and Human Genom…
123	Effect of commonly used pediatric antibiotics on gut microbial diversity in preschool children in Burkina Faso: A randomized clinical trial	Oldenburg et al, 2018	Yes	No disease studied.	Children aged 6–59 months randomized (1:1:1:1) to a 5-day course of 1 of 3 antibiotics, in 2 rural communities of the Health and Demographic Surveillance Site (HDSS) in Nouna District, Burkina Faso.	Burkina Faso	Rural	16S rRNA gene sequencing	Randomized Clinical Trial	124	Rectal swabs	6–59 months	67/57	Not indicated.	Aim: To assess the effect of a short course of 3 commonly used pediatric antibiotics on the intestinal microbiome in healthy preschool children.	Antibiotics: amoxicillin, azithromycin and cotrimoxazole.	The authors demonstrated that a short course of azithromycin led to a significant decrease in bacterial diversity of the intestinal microbiome in preschool children. Amoxicillin and cotrimoxazole dosing consistent with that used for prophylaxis in children living with HIV did not lead to a significant difference in bacterial diversity. Although the clinical	This work was supported in part by the Research to Prevent Blindness Career Development Award and the National Eye Institute of the National Institutes of Health.
992	Robust Variation in Infant Gut Microbiome Assembly Across a Spectrum of Lifestyles	Olm et al, 2022	Yes	No disease studied.	Infants from the Hadza hunter-gatherers of Tanzania.	Tanzania	Not indicated.	16S rRNA sequencing	Observational study	1900	Stool samples	0- 36 months	Not indicated.	Hadza	Aim: To perform metagenomic sequencing on infant fecal samples from the Hadza, a group of modern hunter-gatherers in Sub-Saharan Africa.	None.	Together the study data show that infants from all lifestyles begin life with similar Bifidobacteria-dominated gut microbiota compositions, but subtle differences detected in early life compound over time.	This study was funded by The National Institutes of Health grants, NSF Graduate Research Fellowship grants, Stanford Graduate Smith Fellowship, The National Institute of Diabetes and Digestive and Kidney Diseases of the National Institutes of Health Award, The Bill and Melinda Gates Foundation as well as Biohub.
1314	The effect of dietary resistant starch type 2 on the microbiota and markers of gut inflammation in rural Malawi children	Ordiz et al, 2015	Yes	No disease studied.	Eighteen 3–5-year-old stunted children (8 boys and 10 girls) from the rural village of Masika in the Machinga District in Malawi.	Malawi	Rural	16S RNA bacterial sequencing/ Illumina HiSeq 2000 platform	Pilot controlled clinical trial	18	Stool samples	3- 5-years	2023-10-08	Not indicated.	Aim: To test whether gut inflammation will be reduced with dietary supplementation with RS in rural Malawian children.	8.5 g/day of dietary resistant starch type 2	RS does not confer physiologically meaningful changes on gut biology, or gut microbial content, after short course treatment. The study data do not preclude the potential use of other prebiotics, but provide no data in support of using RS to improve gut health in the studied sub-Saharan childhood population.	This work was supported by Flinders University, the Bill & Melinda Gates Foundation, NIH grants, and the National Institutes of Health Grant.
63	Environmental Enteric Dysfunction and the Fecal Microbiota in Malawian Children.	Ordiz et al, 2017	Yes	Environmental enteric dysfunction (EED). Disease is not of public health significance.	Eighty-one 12- to 23-month-old healthy Malawian children (47 boys and 34 girls) selected from the rural areas of Machinga and Nsanje districts.	Malawi	Rural	16S ribosomal RNA gene sequencing	Prospective randomized controlled clinical trial	81	Stool samples	12 to 23 months	34/47	Not indicated.	Aim: To determine which bacterial taxa were associated with EED.	Legumes: Beans or cowpeas	EED is not associated with a profound fecal dysbiosis, but six genera were identified as having significantly different abundances in EED.	This study was supported by the Feed the Future Program, USAID, and the Children's Discovery Institute of Washington University and St. Louis Children's Hospital.
1299	The effect of legume supplementation on the gut microbiota in rural Malawian infants aged 6 to 12 months	Ordiz et al, 2020	Yes	No disease studied.	Children aged 5.5 to 6.5 months resident in the Masenjere or Limela village clusters in southern Malawi.	Malawi	Rural	16S rRNA gene sequencing/ Illumina MiSeq	Prospective, randomized, double-blinded, controlled clinical trial	236	Stool samples	6-12 months	113/123	Not indicated.	Objective: To determine if a daily legume supplement given to Malawian infants aged 6 to 12 month alters the 16S configuration of the fecal microbiota as read out by amplicon sequence variants (ASVs).	Common bean and cowpea	In conclusion, extensive 16S sequencing of fecal samples from a trial of cowpea supplementation in rural African infants did not reveal a microbiota signature for stunting. Observations concerning Lactobacillus mucosae, thought to enhance tight junction integrity, from the trial may fuel further hypothesis testing regarding environmental enteric dysfunction. The association of the Veillonella gen…	This study was supported by the United States Agency for International Development (USAID), as part of Feed the Future, the US government's global hunger and food security initiative, under the terms of Cooperative Agreement, and the Children's Discovery Institute of Washington University and St. Louis Children's Hospital.
1065	The gut microbiome but not the resistome is associated with urogenital schistosomiasis in preschool-aged children	Osakunor et al, 2020	Yes	Urogenital schistosomiasis. Disease is not of public health significance.	Zimbabwean preschool-aged (1- 5 years) children.	Zimbabwe	Rural	Shotgun metagenomic sequencing/ Illumina Hiseq 4000 platform	Cross-sectional study	113	Stool samples	1- 5 years	56/57	Not indicated.	Aim: To test whether infection with the human helminth parasite, Schistosoma haematobium, is associated with changes in gut microbial and antimicrobial resistance gene abundance/diversity.	None.	The authors identified differences in the gut microbiome between schistosome infected and uninfected children, showing largely an increase in abundance of specific bacteria. Hence, they describe a novel metagenomic dataset of the Zimbabwean preschool-aged children, indicating an association between urogenital schistosome infection and changes in the gut microbiome.	This research is supported by the Thrasher Research Fund, Wellcome Trust, and the Oak Foundation.
1253	Multi-Nutrient Fortified Dairy-Based Drink Reduces Anaemia without Observed Adverse Effects on Gut Microbiota in Anaemic Malnourished Nigerian Toddlers: A Randomised Dose–Response Study	Owolabi et al, 2021	Yes	Anaemia/ malnourishment. Conditions are not of public health significance.	Apparently healthy Nigerian toddlers (n = 184), but having mild-moderate anaemia (Hb ≥ 7.0 g/dL and ≤10.9 g/dL) and mild-moderate acute malnutrition (Height-for-age Z score (HAZ) and/or Weight-for-age Z score (WAZ) <−1 SD and >−3 SD).	Nigeria	Not indicated.	16S rRNA gene sequencing	Three-arm, open (blind for biochemical analyses) randomised intervention trial.	105	Stool samples	12- 36 months	58/47	Not indicated.	Aim: This study aimed to investigate the effect of different doses of multi-nutrient fortified dairy-based drink (including iron) on the reduction of anaemia prevalence in the target population without stimulating potential pathogenic bacteria in the gut.	Multi-nutrient fortified dairy-based drink (Peak 123, FrieslandCampina Wamco, Lagos, Nigeria), in amounts of 200, 400 or 600 mL per day.	This study shows that daily consumption of 200–600 mL of iron-fortified multi-nutrient fortified dairy-based drink reduces anaemia without stimulating potential pathogenic gut bacteria in Nigerian toddlers.	This study was funded by FrieslandCampina, Amersfoort, The Netherlands.
59	Changes in the gut microbiota of Nigerian infants within the first year of life	Oyedemi et al, 2022	Yes	No disease studied.	Twenty eight Nigerian infants (9 males and 19 females)	Nigeria	Not indicated.	16S rRNA gene Sequencing/ Illumina MiSeq platform	Longitudinal cohort study	28	Stool samples	First year of life.	19/9	Not indicated.	Aim: To investigate the changes in the gut microbiota of a cohort of Nigerian infants within the first year of life based on delivery mode, age and diet.	Delivery mode, age and diet.	The observed taxonomic differences in the gut microbiota between pre-weaning and weaning samples in Nigerian infants, as well as butyrate production, were influenced by diet. Introduction of solid foods encouraged an increase in microbial diversity, helpful for a healthy life.	The study was supported by the Rowett Institute (University of Aberdeen), which receives financial support from the Scottish Government Rural and Environmental Sciences and Analytical Services (RESAS).
2463	Anemia and Iron Status are Predictors of Gut Microbiome Composition and Metabolites in Infants and Children in Rural Kenya	Paganini et al, 2016	Yes	Anaemia. Disease is not of public health significance.	Infants (4–6 month-olds) and preschool children (2–5 yr-olds) (n=134) in rural Kenya	Kenya	Rural	16S pyrosequencing and targeted real-time PCR (qPCR)	Cross sectional study	134	Stool samples	4 months- 5 years	Not indicated.	Not indicated.	Not indicated.	None.	In infancy, higher Hb and better iron status predict higher amounts of pathogenic E.coli. In contrast, among older children, higher Hb and better iron status predict lower amounts of pathogenic E.coli. Anemic infants and children do not have greater gut inflammation, but have lower fecal butyrate concentrations, compared to nonanemic children. Thus, relationships between anemia, iron status and p…	This project was supported by the Eunice Kennedy Shriver National Institute Of Child Health & Human Development, the European Union's Seventh Framework Programme (Fp7/2007-2013) and the ETH Zurich, Switzerland.
975	Prebiotic galacto-oligosaccharides mitigate the adverse effects of iron fortification on the gut microbiome: a randomised controlled study in Kenyan infants	Paganini et al, 2017	Yes	No disease studied.	Kenyan infants aged 6.5–9.5 months (n=155)	Kenya	Not indicated.	16S rDNA sequencing/ Illumina MiSeq	4-month, controlled, double-blind trial	155	Stool samples	6.5- 9.5 months	78/77	Not indicated.	Objective: To evaluate the efficacy and safety of a new MNP formula with prebiotic galacto-oligosaccharides (GOS) combined with a low dose (5 mg/day) of highly bioavailable iron.	(1) a MNP without iron (control); (2) the identical MNP but with 5 mg iron (2.5 mg as sodium iron ethylenediaminetetraacetate and 2.5 mg as ferrous fumarate) (Fe group); or (3) the identical MNP as the Fe group but with 7.5 g GOS (FeGOS group).	A MNP containing a 5 mg daily dose of highly bioavailable iron is efficacious in reducing IDA in African infants, and this low dose is likely safer in that it induces less adverse changes in the gut microbiome and no increase in faecal calprotectin compared with a 12.5 mg iron dose. The findings suggest that prebiotics given with iron-containing MNPs in the African setting may be beneficial to re…	This study was supported by ETH Global and the Sawiris Foundation for Social Development, ETH Zurich, Switzerland and DSM Nutritional Products, Kaiseraugst, Switzerland. Sight and Life (Kaiseraugst, Switzerland) donated the MNPs used in this study. FrieslandCampina (Wageningen, The Netherlands) donated the GOS used in this study.
982	Iron-containing micronutrient powders modify the effect of oral antibiotics on the infant gut microbiome and increase post-antibiotic diarrhoea risk: a controlled study in Kenya	Paganini et al, 2019	Yes	No disease studied.	Four groups of community-dwelling Kenyan infants (n=28; aged 8–10 months).	Kenya	Not indcated.	16S rDNA sequencing/ Illumina MiSeq	A 4-month, double-blind randomised controlled intervention trial.	28	Stool samples	8- 10 months	2023-09-19	Not indicated.	Aim: To determine the effect of antibiotics on the gut microbiome of Kenyan infants when given with or without iron-containing MNPs.	(A) antibiotics for 5 days and iron-MNPs for 40 days (Fe+Ab+); (B) antibiotics and no-iron-MNPs (Fe−Ab+); (C) no antibiotics and iron-MNPs (Fe+Ab−); or (D) no antibiotics and no-iron-MNPs (Fe−Ab−).	The study findings need confirmation in a larger study but suggest that, in African infants, iron fortification modifies the response to broad-spectrum antibiotics: iron may reduce their efficacy against potential enteropathogens, particularly pathogenic E. coli, and may increase risk for diarrhoea.	Funding was provided by ETH Global and the Sawiris Foundation for Social Development, ETH Zurich, Switzerland, and DSM Nutritional Products, Kaiseraugst, Switzerland. Sight and Life (Kaiseraugst, Switzerland) donated the micronutrient powders used in this study.
86	Maternal Human Milk Oligosaccharide Profile Modulates the Impact of an Intervention with Iron and Galacto-Oligosaccharides in Kenyan Infants.	Paganini et al, 2019	Yes	No disease studied.	Mother–infant pairs (n = 80) participating in a 4-month intervention trial in which the infants (aged 6.5–9.5 months) received daily a micronutrient powder without iron, with iron or with iron and GOS.	Kenya	Rural	16S rDNA sequencing/ Illumina MiSeq and qPCR for selected enteropathogens.	Sub-study of a double-masked randomized controlled intervention trial.	75	Stool samples	Infants aged 6.5–9.5 months.	Infants: 41/34	Not indicated.	Aims: To determine breast milk HMO concentrations and secretor status of lactating Kenyan mothers and investigate the effect of maternal secretor status on the maternal and infant gut microbiota composition and gut inflammation, as well as on infant iron status and growth; and (2) investigate the effect of maternal secretor status on the infant response to iron fortificants with or without co-pro…	Breast milk HMO concentrations and maternal secretor status.	In conclusion, compared to infants of secretor mothers, infants of non-secretor mothers may be more vulnerable to the adverse effect of fortificant iron on the gut microbiota, resulting in decreased abundances of Bifidobacterium and increased abundances of enteropathogens, but also benefit more from the co-provision of GOS in terms of beneficial effects on the gut microbiota and improving iron st…	Funding was provided by ETH Global and the Sawiris Foundation for Social Development, ETH Zurich, Switzerland, and DSM Nutritional Products, Kaiseraugst, Switzerland.
1083	Dysbiotic Fecal Microbiome in HIV-1 Infected Individuals in Ghana	Parbie et al, 2021	Yes	HIV-1. Disease is of public health signifcance.	Matched pairs of HIV-1 infected (HIV+) and uninfected (seronegative; HIV-) individuals.	Ghana	Peri-urban	16S rRNA Gene Sequencing/ Illumina MiSeq	Cross-sectional case-control study	110	Stool samples	Not indicated.	86/24	Not indicated.	Aim: To compare fecal microbiome in HIV-1 infected and uninfected groups matched on gender, age, and community of residence in Ghana.	None.	Analysis revealed significant difference in fecal microbiome diversity and compositions between HIV-1 infected and uninfected individuals. Particulalry, the study revealed the characteristics of dysbiotic fecal microbiome in HIV-1 infected adults in Ghana, a representative of West African populations.	This study was supported by Japan Agency for Medical Research & Development (AMED), AMED-JICA (the Science and Technology Research Partnership for Sustainable Development [SATREPS]; JP20jm0110012), and the Ministry of Education, Culture, Sports, Science, and Technology in Japan. The Kumamoto University International Scholarship Program generously provided travel support during this study.
30	Fecal Microbiome Composition in Healthy Adults in Ghana.	Parbie et al, 2021	Yes	No disease studied.	55 healthy Ghanaian adults above 18 years of age from 6 communities in the eastern region of Ghana (Akwadum, Jumapo, Koforidua, Oyoko, Suhum, and Tafo).	Ghana	Peri-urban	16S rRNA gene sequencing/ Illumina MiSeq instrument	Cross-sectional study.	55	Stool samples	Not indicated.	42/13	Not indicated.	Aim: To characterize the fecal microbiome in healthy adults in Ghana, West Africa.	None.	The fecal microbiome of the Ghanaian adults was dominated by Firmicutes (Faecalibacterium, Subdoligranulum, and Ruminococcaceae UCG-014), Proteobacteria (Escherichia-Shigella and Klebsiella), and Bacteroidetes (Prevotella 9 and Bacteroides), consistent with previous observations in African cohorts.	This study was supported by Japan Agency for Medical Research & Development (AMED) and AMED-JICA (the Science and Technology Research Partnership for Sustainable Development [SATREPS], as well as the Ministry of Education, Culture, Sports, Science and Technology in Japan.
3112	Gut Microbiota Alteration is Characterized by a Proteobacteria and Fusobacteria Bloom in Kwashiorkor and a Bacteroidetes Paucity in Marasmus	Pham et al, 2019	Yes	Kwashiorkor and Marasmus. Diseases are not of public health significance.	Malnourished children with kwashiorkor, and healthy children without any anthropometric deficit (no wasting, no stunting and not underweight) from Niger and Senegal.	Niger and Senegal	Not indicated.	16S rRNA sequencing/ Microbial culturomics	Observational study	22	Stool samples	Not indicated.	Not indicated.	Not indicated.	Aim/ objective: To investigate whether alterations to the gut microbiota in healthy children, and in children diagnosed with marasmus or kwashiorkor exhibited a gradient that paralleled the decreasing mineral, antioxidant, and protein levels.	None.	Alteration of the gut microbiota, including a bloom of Proteobacteria and Fusobacteria and pathogenic invasion, was identified as a specific, instrumental factor in kwashiorkor, stressing the need for non-dietary treatments including broad-spectrum antibiotics such as cephalosporins (amoxicillin is inadequate for Enterobacteriaceae due to β-lactamase) and/or probiotic mixtures exhibiting antagoni…	This work was supported by the French Government under the « Investissements d’avenir » (Investments for the Future) program managed by the Agence Nationale de la Recherche (ANR, fr: National Agency for Research), (reference: Méditerranée Infection 10-IAHU-03).
2363	Impact of azithromycin mass drug administration on the antibiotic-resistant gut microbiome in children: a randomized, controlled trial	Pickering et al, 2022	Yes	No disease studied.	Children aged 1–59 months and weighing ≥ 3.8 kg.	Malawi	Village	Metagenomic sequencing	Randomized, controlled trial	182	Stool samples	1- 59 months	85/97	Not indicated.	Aims/ objectives: To evaluate the impact of azithromycin MDA on the prevalence of gastrointestinal carriage of macrolide-resistant bacteria in communities within the MORDOR Malawi study site, where the observed reduction in childhood mortality after azithromycin treatment was considerably less than in Niger. Additionally, this study investigated changes in the gut microbiome after treatment.	Azithromycin	This study found significant changes in the antimicrobial resistance profile and gut microbiome after four biannual rounds of azithromycin. Carriage of macrolide resistance was increased by treatment. Abundance of the putative human enteropathogen E. albertii was increased after treatment, as well as several opportunistic Acinetobacter pathogens.	This work was funded by the Bill and Melinda Gates Foundation.
986	Design and application of a novel two-amplicon approach for defining eukaryotic microbiota	Popovic et al, 2018	Yes	Severe Acute Malnutrition. Disease is not of public health sisgnificance.	46 hospitalized Malawian children suffering from Severe Acute Malnutrition (SAM)	Malawi	Not indicated.	16S rRNA gene sequencing	Observational study	46	Stool samples	Not indicated.	Not indicated.	Not indicated.	Aims/Objectives: To design a novel two-amplicon surveillance tool, based on sequencing regions of ribosomal RNA genes and their internal transcribed spacers. To demonstrate the utility of the approach by characterizing the eukaryotic microbiota of 46 hospitalized Malawian children suffering from Severe Acute Malnutrition (SAM).	None.	The combined sequence information allowed the authors to uncover protozoa, microsporidia, helminths, and fungi, and putative relationships between the eukaryote Blastocystis and bacteria. They expect that future applications of this method to clinical and environmental samples will begin to uncover the full diversity of eukaryotic microbes, together with their interactions with other microbiota, …	Funding was provided by the Center for Global Child Health, SickKids Research Institute & Natural Sciences and Engineering Research Council of Canada.
1185	Altered Faecal Microbiota Composition and Structure of Ghanaian Children with Acute Gastroenteritis	Quaye et al, 2023	Yes	Acute Gastroenteritis. Disease is of public health significance since it is a Diarrhoeal disease.	Children admitted or presented to the hospital with AGE and Children who were otherwise healthy at the time of sample collection, without AGE (diarrhoea).	Ghana	Not indicated.	16S rRNA gene sequencing/ Illumina MiSeq	Cross-sectional case–control study	107	Stool samples	1.5- 60 months	47/60	Not indicated.	Aim: To explore the faecal microbiota of Ghanaian children ≤ 5 years with and without AGE.	None.	In conclusion, the study showed differences in faecal microbiota profiles between Ghanaian children with and without AGE. The faecal microbiota of AGE cases was dominated by disease-associated bacterial genera, most of which were notable members of the upper GIT and was depleted in beneficial bacteria linked with good health. Finally, whole microbial community network characteristics differed bet…	The study was funded by DELTAS Africa grant, Wellcome Trust and the UK government.
45	A comparative study of the gut microbiome in Egyptian patients with Type I and Type II diabetes.	Radwan et al, 2020	Yes	Type I (TID) and Type II (TIID) diabetes. Disease is of public health significance.	47 Egyptians: Outpatients of Al-Hussein hospital, Cairo, Egypt controls, 22 TID and 18 TIID as well as 7 healthy controls.	Egypt	Not indicated.	16S rRNA amplicon sequencing/ Illumina MiSeq	Comparative study	47	Stool samples	Not indicated.	Not indicated.	Not indicated.	Aims: To investigate the gut microbiome of 47 Egyptian citizens (7 healthy controls, 22 TID and 18 TIID), using the conserved V4 region of the bacterial 16S ribosomal DNA. To also compare the composition, diversity and richness (number of species) of the fecal microbial ecosystem of healthy, TID and TIID patients.	None.	The results highlighted a significant increase in abundance of Gram negative, potentially opportunistic pathogenic taxa (Pseudomonas, Prevotella) in all diabetic groups, compared to the control. The gram-positive Gemella, which is associated with increased risk to diabetes, also had a significant increase in abundance in all diabetic groups, compared to the control. In contrast, the commensal bac…	Funding for this project is from the Egyptian Cultural and Educational Bureau. Start up funding provided by Colorado State University was also partially used for this project.
89	High-throughput sequencing of pooled samples to determine community-level microbiome diversity.	Ray et al, 2019	Yes	No disease studied.	Children aged 1–60 months, who participated in a previously described randomized controlled trial (RCT) in Niger.	Niger	Niger	16S rRNA gene deep sequencing/ MiSeq Illumina	Observational study	80	Rectal swabs	1–60 months	49/31	Not indicated.	Aims: To estimate gamma diversity of a community using laboratory pooled specimens, as well as to compare gamma diversity estimates using the established method of collecting and sequencing individual samples to pooling samples before sequencing, and assess whether pooling may be an efficient outcome for Cluster randomized control trials (CRTs).	None.	Gamma diversity is a relevant metric in CRTs. As previously shown, the microbiome changes daily and is dependent on the environment or one's surrounding community. Pooling microbiome samples before DNA amplification to estimate community level diversity is a viable and valuable measure to consider in population-level association research studies.	This study was supported by the Bill and Melinda Gates Foundation, United States, the Peierls Foundation, the National Eye Institute of the National Institutes of Health, the Research to Prevent Blindness Career Development Award; and an unrestricted grant from Research to Prevent Blindness.
2410	The fecal microbiome and rotavirus vaccine immunogenicity in rural Zimbabwean infants	Robertson et al, 2021	Yes	No disease studied.	158 infants enrolled in a cluster randomized 2 × 2 factorial trial of improved water, sanitation and hygiene and infant feeding in rural Zimbabwe (SHINE trial: NCT01824940), with available plasma samples, oral rotavirus vaccine records and stool samples collected within 30 days of either vaccine dose.	Zimbabwe	Rural	Whole metagenome shotgun sequencing/ Illumina HiSeq 2500 or HiSeqX platforms	Observational study	158	Stool samples	Not indicated.	69/89	Not indicated.	Aim/objective: To explore whether alterations in the composition of the fecal microbiome are associated with RVV immunogenicity, by conducting whole metagenome shotgun sequencing of stool samples from infants around the time of RVV.	None.	In conclusion, the authors found no clear stool microbiome signature associated with oral RVV immunogenicity in rural Zimbabwean infants. Future studies incorporating protection from rotavirus disease, are warranted.	This work was supported by the Wellcome Trust. The SHINE trial was funded by the Bill and Melinda Gates Foundation; UK Department for International Development (UK Aid); Swiss Agency for Development and Cooperation and US National Institutes of Health.
2919	The gut microbiome and early-life growth in a population with high prevalence of stunting	Robertson et al, 2023	Yes	No disease studied.	335 children from rural Zimbabwe from 1–18 months of age who were enrolled in the Sanitation, Hygiene, Infant Nutrition Efficacy Trial (SHINE; NCT01824940), a randomized trial of improved water, sanitation and hygiene (WASH) and infant and young child feeding (IYCF).	Zimbabwe	Rural	Whole metagenomic sequencing/ Illumina HiSeq 2500 or HiSeqX platforms	Sub-study of a cluster randomized trial	355	Stool samples	1- 18 months	Not indicated.	Not indicated.	Aim/ objective: To characterize the succession and maturation of the fecal microbiome from 1–18 months of age in 335 children from rural Zimbabwe who were enrolled in the Sanitation, Hygiene, Infant Nutrition Efficacy (SHINE) Trial.	None.	Collectively, these data suggest that HIV exposure shapes maturation of the infant gut microbiota, and that the functional composition of the infant gut microbiome is moderately predictive of infant growth in a population at high risk of stunting.	Bill & Melinda Gates Foundation, with a subcontract to the University of British Columbia. United Kingdom Department for International Development. Wellcome Trust. Swiss Agency for Development and Cooperation. US National Institutes of Health. UNICEF.
1110	Evolution of the gut microbiome followingacute HIV-1 infection	Rocafort et al, 2019	Yes	Human immunodeficiency virus (HIV)-1 infection. Disease is of public health significance.	49 Mozambican subjects diagnosed with recent HIV-1 infection (RHI) and 55 HIV-1-negative controls for 9–18 months and 98 chronically HIV-1-infected subjects treated with antiretrovirals (n = 27) or not (n = 71).	Mozambique	Not indicated.	16S rRNA gene sequencing/ Illumina MiSeq platform	Sub-study of prospective observational cohort study	202	Stool samples	Not indicated.	142/60	Not indicated.	Aim: To investigate the evolution of the gut bacteriome and of several clinically relevant eukaryotic viruses following HIV-1 infection in Mozambique.	None.	The study shows that HIV-1 infection is followed by increased fecal Adenovirus shedding and by transient, non-HIV-specific changes in the gut bacteriome. Despite early resilience to change, an HIV-1-specific signature in the gut microbiome including depletion of Akkermansia, Anaerovibrio, Bifidobacterium, and Clostridiumcan be identified in chronically HIV-1-infected subjects.	This study was supported by a grant from the Fondo de Investigaciones Sanitarias (FIS), Instituto de Salud Carlos III and the European Regional Development Fund (ERDF), the Bill and Melinda Gates Foundation, and through philanthropic donations from the Fundació Glòria Soler, the People in Red – Barcelona 2016 edition and the Fundació Catalunya La Pedrera. It was also supported by the Red de SIDA,…
974	Effect of radiotherapy on the gut microbiome in pediatric cancer patients:a pilot study	Sahly et al, 2019	Yes	Rhabdomyosarcoma. Not a disease of public health significance.	Ten fecal samples from three pediatric cancer patients, suffering from rhabdomyosarcoma near their pelvic region, and two healthy individuals.	Egypt	Not indicated.	16S rRNA sequencing/ Illumina MiSeq platform	Pilot study	5	Stool samples	3.5- 7 years	Males only	Not indicated.	Aim/s: To analyze ten fecal samples from three pediatric cancer patients, suffering from rhabdomyosarcoma near their pelvic region, and two healthy individuals, as well as to correlatate microbial composition with response to treatment.	Chemotherapy (Cyclophosphamide, Vincristine and Dactinomycin) and radiotherapy dose of 50.4 Gy on 28 fractions (180 cGy/fraction).	A correlation between microbial composition and response to treatment was reported, in which the responders had generally a lower microbial diversity compared to non-responders. In addition, nucleotide changes and deletions in the tested 16S rRNA sequences post radiotherapy were detected.	This study was supported by Zewail City for Science and Technology, and an institutional fellowship award from the American University in Cairo (AUC).
38	New Insights on Obesity and Diabetes from Gut Microbiome Alterations in Egyptian Adults	Salah et al, 2019	Yes	Diabetes. Disease is of public health sisgnificance.	Adult patients with obesity and diabetes in Egypt.	Egypt	Not indicated.	16S ribosomal RNA sequencing/ Illumina MiSeq platform	Observational/ comparative study	60	Stool samples	Not indicated.	29/31	Not indicated.	Aim: To report notable differences in gut microbiome in adult patients with obesity and diabetes in a population sample from the El-Sharkia governate in north-east Egypt.	None.	Both obesity and diabetes greatly affect and be affected by gut microbiota and this is supported by significant differences in relative abundance of many taxa. Notably, the relative abundance of Firmicutes and Bacteroidetes phyla in obese and diabetic individuals and the F/B ratio are still the most discriminative factors between the patient cases studied in the present study and healthy individu…	The authors received no specific grant from any funding agency.
43	MALDI-TOF identification of the human Gut microbiome in people with and without diarrhea in Senegal.	Samb-Ba et al, 2014	Yes	Diarrhea. Diarrhoeal diseases are of public health significance.	347 children and adults (162 with diarrhea and 185 without diarrhea) sampled in health centers in Dakar, Senegal.	Senegal	Not indicated.	16S rRNA sequencing	Observational/comparative study.	347	Stool samples	0 to 20 years/ and >20	Not indicated.	Not indicated.	Aim: To evaluate the effectiveness of MALDI-TOF mass spectrometry on the identification of bacterial species isolated from feces from Senegalese patients with and without diarrhea by combining several culture conditions and rapid mass spectrometry identification.	None.	A modification of the gut microbiota was observed between the two groups. In individuals with diarrhea, major commensal bacterial species such as E. coli were significantly decreased (85% versus 64%), as were several Enterococcus spp. (E. faecium and E. casseliflavus) and anaerobes, such as Bacteroides spp. (B. uniformis and B. vulgatus) and Clostridium spp. (C. bifermentans, C. orbiscindens, C. …	This work was supported by the Institut Hospitalo-Universitaire Méditerranée-Infection.
42	Investigations on the interplays between Schistosoma mansoni, praziquantel and the gut microbiome.	Schneeberger et al, 2018	Yes	Schistosomiasis. Disease is not of public health significance.	34 Schistosoma mansoni infected and uninfected children from Côte d’Ivoire.	Côte d’Ivoire	Rural	Illumina MiSeq sequencing system.	Observational/ comparative study	34	Stool samples	2–13 years	Not indicated.	Not indicated.	Aims: To investigate the associations between S. mansoni, praziquantel and the gut microbial composition in the framework of a randomized, controlled, dose-finding and pharmacokinetic trial of praziquantel in preschool-aged and school-aged children. Samples were analysed to explore differences in microbial composition between (i) infected and non-infected children, (ii) those receiving praziquant…	Praziquantel.	Overall taxonomic profiling and diversity indicators were found to be close to a “healthy” gut structure in all children. Slight overall compositional changes were observed between S. mansoni-infected and non-infected children. Praziquantel treatment was not linked to a major shift in the gut taxonomic profiles, thus reinforcing the good safety profile of the drug by ruling out off-targets effect…	Funding was obtained by the European Research Council.
381	Gut Microbiome 16S rRNA Gene Amplicon Taxonomic Profiling of Hospitalized Moroccan COVID-19 Patients	Sehli et al, 2022	Yes	Coronavirus disease 2019 (COVID-19) . Disease is of public health significance.	Four Moroccan patients with COVID-19 during hospitalization at the Cheikh Khalifa International University Hospital in Casablanca, Morocco, as well as 4 healthy controls.	Morocco	Not indicated.	16S rRNA gene metataxonomic profiling method/ Illumina MiSeq sequencer.	Observational/comparative study	8	Stool samples	30-63 years	2023-05-03	Not indicated.	Aims: To explore the gut microbiome composition in four Moroccan patients with coronavirus disease 2019 (COVID-19) during hospitalization and treatment, using 16S rRNA gene amplicon metataxonomic profiling, as well as to compare it with that in four healthy severe acute respiratory syndrome coronavirus 2 (SARS-CoV-2)-free control subjects.	Chloroquine and azithromycin.	The 16S rRNA gene metataxonomic profiling method revealed differences in microbiome composition and richness changes between hospitalized/treated COVID-19 patients and healthy controls. These findings support the expected impact of antibiotic treatment on the microbiome diversity of COVID-19 patients but point toward potential specific gut microbiota-SARS-CoV-2 interactions.	Not indicated.
1665	The role of probiotics in children with autism spectrum disorder: A prospective, open-label study	Shaaban et al, 2018	Yes	Autism spectrum disorder. Disorder is not of public health significance.	30 children with ASD (19 boys and 11 girls) with ages ranging from 5 to 9 years, and 30 gender- and age-matched healthy controls recruited from patients’ relatives.	Egypt	Not indicated.	Quantitative real-time PCR	A prospective, open-label study	60	Stool samples	5- 9 years	Autistic children: 11/19	Not indicated.	Aim: To evaluate the efficacy and tolerability of probiotics in an Egyptian cohort of children with ASD.	Dried carrot with three probiotic strains (Lactobacillus acidophilus, Lactobacillus rhamnosus and Bifidobacteria longum).	Probiotics have beneficial effects on both behavioral and GI manifestations of ASD. Probiotics (a non-pharmacological and relatively risk-free option) could be recommended for children with ASD as an adjuvant therapy as they can affect and normalize GI micro flora composition.	None.
39	Gut microbiota in HIV–pneumonia patients is related to peripheral CD4 counts, lung microbiota, and in vitro macrophage dysfunction	Shenoy et al, 2019	Yes	HIV–pneumonia. Disease is of public health significance.	HIV infected patients with pneumonia admitted to Mulago Hospital in Kampala, Uganda.	Uganda	Not indicated.	V4 16S rRNA amplicon sequencing/ Illumina MiSeq Platform	Observational/ cross-sectional study	153	Stool samples	Not indicated.	Not indicated.	Not indicated.	Aims: To investigate whether lower airway microbiota dysbiosis observed in HIV-infected pneumonia patients is accompanied by a parallel gut microbiota perturbation. To further investigate whether gut microbiota composition of HIV-infected pneumonia patients is related to peripheral CD4 cell count and if the products of the gut microbiome influence the behavior of immune cell populations crucial t…	None.	This study is the first to reveal a systemic microbiota perturbation in HIV-infected pneumonia patients and a relationship between gut microbiota composition and CD4 status. Moreover, it provides the first evidence that the products of the gut microbiome of HIV-infected patients with low CD4 counts alter monocyte effector phenotypes, reducing their capacity for repair and promoting a program of p…	This work was supported by National Institutes of Health/NHLBI awards
2937	Mucosa‐associated cultivable aerobic gut bacterial microbiota among colorectal cancer patients attending at the referral hospitals of Amhara Regional State, Ethiopia	Siraj et al, 2021	Yes	Colorectal cancer. Disease is of public health significance.	15 confirmed CRC patients who underwent surgical resections of cancerous tissues during April 2017 to February 2018 at Felege Hiwot Referral and University of Gondar Teaching Hospitals.	Ethiopia	Not indicated.	Bacterial cultivation, quantification and characterization.	Observational study	15	Malignant and adjacent normal tissue biopsies.	38- 79 years	2023-06-09	Not indicated.	Aim: This study is aimed at determining the microbial distribution and characterizing cultivable aerobic gut mucosal associated bacteriobiota among cancerous and adjacent apparently normal tissues of colorectal cancer patients.	None.	Findings presented in the current study suggested a relative abundance and distributions of cultivable aerobic bacterial microbiota of malignant tissues were significantly different from its adjacent normal tissue biopsies. The study also showed that families of Enterobacteriaceae and Enterococcaceae were the most frequently recovered bacterial family from malignant tissues while detail considera…	This research was funded by Bahir Dar University, College of Medicine and Health Sciences–Staff Research Grant/2016-17.
410	Impact of the Post-Transplant Period and Lifestyle Diseases on Human Gut Microbiota in Kidney Graft Recipients	Souai et al, 2020	Yes	Lifestyle diseases such as diabetes, atherosclerosis, and hypertension. These are diseases of public health significance.	Forty renal transplant recipients attending the Tunisian Military University hospital and 18 healthy participants.	Tunisia	Not indicated.	16S rRNA gene sequencing/ llumina MiSeq platform	Observational study	58	Stool samples	Kidney transplant individuals: 17- 67 years	Kidney transplant individuals: 12/28	Not indicated.	Aim: To characterize the structure of gut microbiota within stable kidney graft recipients.	Kidney transplant	The study shows specific kidney transplant-related effects of the fecal microbiome on graft stability and patient’s health status when compared to healthy subjects. Therefore, the overall microbial community structure of the kidney transplanted group was clearly different from control subjects. Such findings suggest that the analysis of the gut microbial community could represent a new tool to be…	This research was funded by a higher education Erasmus plus grant and the project.
2292	Metagenomic analysis of gut microbiota of patients with colorectal cancer at the Federal Medical Centre (FMC), Abeokuta, Ogun State, Nigeria	Sulaimon et al, 2023	Yes	Colorectal cancer (CRC). Disease is of public health significance.	Healthy and CRC subjects at the Federal Medical Centre, Abeokuta, Ogun State, Nigeria	Nigeria	Not indicated.	Whole genome sequencing/ Nanopore MinION sequencer	Observational study	40	Stool samples	Not indicated.	Not indicated.	Not indicated.	Aim/ objective: The study sought to investigate changes in intestinal bacteria in healthy subjects and patients with CRC.	None.	The present study demonstrated that the taxonomic composition and functional genes of intestinal bacteria were significantly altered in CRC. Also, E. coli and P. aeruginosa are at least partially involved in the pathogenesis of CRC.	None.
1020	Short- and long-read metagenomics of urban and rural South African gut microbiomes reveal atransitional composition and undescribed taxa	Tamburini et al, 2022	Yes	No disease studied.	Women aged 40–72 years in Soweto, South Africa and Bushbuckridge Municipality, South Africa	South Africa	Urban and rural	Metagenomic sequencing/ HiSeq 4000 platform (Illumina)	Observational study	169	Stool sample	40- 72	Women only.	Ethnicities: BaPedi, Ndebele, Sotho, Tsonga, Tswana, Venda, Xhosa, Zulu, Other, or Unknown.	Aim: To evaluate gut microbiome composition in transitioning South African populations using short- and long-read sequencing.	None.	The results suggest that the gut microbiome of South Africans does not conform to a simple “western-nonwestern” axis and contains undescribed microbial diversity.	This work was supported in part by a grant from the Stanford Center for Innovation in Global Health and by NIH grant P30 CA124435, which supports the following Stanford Cancer Institute Shared Resource: the Genetics Bioinformatics Service Center.
82	Iron in Micronutrient Powder Promotes an Unfavorable Gut Microbiota in Kenyan Infants	Tang et al, 2017	Yes	No disease studied.	Six-month-old, non- or mildly anemic, predominantly-breastfed Kenyan infants in a rural malaria-endemic area.	Kenya	Rural	16S rRNA gene sequencing/ Illumina Miseq platform	Double-blind, individually-randomized, controlled trial	45	Stool samples	6–9 months	23/22	Not indicated.	Aims: To identify the effects of iron on the gut microbiome and inflammation status of the host in non- or mildly-anemic infants; and To determine the effects of iron in MNP on zinc absorption and the size of the exchangeable zinc pool, as an indicator of zinc status, after three months of home fortification with daily MNP in maize-based diets.	Multiple micronutrient powder (MNP) with and without iron.	MNP fortification over three months in non- or mildly anemic Kenyan infants can potentially alter the gut microbiome. Consistent with previous research, addition of iron to the MNP may adversely affect the colonization of potential beneficial microbes and attenuate the decrease of potential pathogens.	This research was funded by International Atomic Energy Agency (IAEA) and; National Institutes of Health/National Center for Research Resources (NIH/NCRR) Colorado Clinical and Translational Sciences Institute (CCTSI). Supplemental grant support was provided by NIH.
2392	A prebiotic-enhanced lipid-based nutrient supplement (LNSp) increases Bifidobacterium relative abundance and enhances short-chain fatty acid production in simulated colonic microbiota from undernourished infants	Toe et al, 2020	Yes	No disease studied.	Three undernourished infants of 10 months living in rural Burkina Faso, West Africa.	Burkina Faso	Rural	16S rRNA gene amplicon sequencing/ Illumina Miseq platform	Observational study	3	Stool sample	All infants are 10 months old.	2023-01-02	Not indicated.	Aim: To assess the effect of an LNS, which is a complementary food supplement for the prevention of undernutrition in children and enriched with prebiotics, on undernourished child microbiota functionality and composition in a dynamic human digestive tract model.	Lipid-base nutrient supplements (LNSs)	The results suggest that provision of prebiotic-enhanced LNS to undernourished children could be a possible strategy to steer the microbiota toward a more beneficial composition and metabolic activity.	This work was supported by the Vlaamse Interuniversitaire Raad-Universitaire Ontwikkelingssamenwerking (VLIR-UOS) and Nutrition Third World, Belgium.
3092	Metagenomic profiling of gut microbiota of diarrhoeic children in Southwest Nigeria	Ugboko et al, 2020	Yes	Diarrhoea. Diarrhoeal diseases are of public health significance.	8 Diarrhoeic children and a control group.	Nigeria	Not indicated.	Amplicon-based metagenomics	Observational study	8	Stool samples	Not indicated.	Not indicated.	Not indicated.	Aim/ objective: To investigate the impact of diarrhoea on the gut microbiome of children under 5 y of age in Southwest Nigeria using metagenomic approach.	None.	An understanding of the impact of diarrhoea on the gut microbiota may help elucidate the role of the gut microbiome in the health and disease status of children in a Sub-Saharan setting, however, this can only be made easy with the application of metagenomics techniques.	Not indicated.
3148	Microbiota richness and diversity in a cohort of underweight HIV-positive children aged 24-72 months in Cape Town, South Africa	Van Niekerk et al, 2019	Yes	Human immunodeficiency virus (HIV). Disease is of public health significance.	HIV-positive children aged 24- 72 months from high disease burden areas within Cape Town.	South Africa	Not indicated.	Culture and molecular-based methods	Observational study	Not indicated.	Stool samples	24- 72 months	Not indicated.	Not indicated.	Aim/ objective: To describe the microbial diversity within a cohort of underweight children on Antiretroviral therapy(ART) & highlights implications for practice.	None.	The potentially pathogenic microbiota contributes to ongoing mucosal inflammation resulting in microbiome changes & disease progression. Microbiota manipulation can reduce inflammation, improve absorptive capacity of the GIT & overall health of the child which will reduce morbidity and mortality.	Not indicated.
31	Intestinal protozoan infections shape fecal bacterial microbiota in children from Guinea-Bissau	von Huth et al, 2021	Yes	Intestinal protozoan infections. Diseases are of public health significance.	Children from Bissau, Guinea-Bissau.	Guinea-Bissau	Urban	16S rRNA gene sequencing/ Illumina MiSeq platform	Prospective no-intervention two-cohort study	1204	Stool samples	2–15 years	554/650	Not indicated.	Aim: To explore how the bacterial composition in stool from children from Guinea-Bissau (Western Africa) is altered by infection with different enteric parasite species.	None.	The authors find that infections with multiple parasite species induces more pronounced changes in the bacterial composition, and that certain parasite species significantly changes the diversity of bacteria.	This study was funded by unrestricted grants from the following: Odense University Hospital Free Research Fund, Region of Southern Denmark Research Fund, Aase and Ejner Danielsen Fund and The A. P. Møller Foundation for the Advancement of Medical Science.
984	Stunted childhood growth is associated with decompartmentalization of the gastrointestinal tract and overgrowth of oropharyngeal taxa	Vonaesch et al, 2018	Yes	No disease studied.	Children (aged 2–5 y) living in Bangui, CAR, or Antananarivo, Madagascar.	Central African Republic and Madagascar	Not indicated.	16S Illumina Amplicon sequencing	Transversal study design	404	Stool samples	2- 5 years	211/193	Not indicated.	Aim: To compare gastric, duodenal, and fecal samples from stunted children and healthy control subjects in both countries, using 16S-based metataxonomics and culture techniques.	None.	The study data suggest that stunting is associated with a microbiome “decompartmentalization” of the gastrointestinal tract characterized by an increased presence of oropharyngeal bacteria from the stomach to the colon, hence challenging the current view of stunting arising solely as a consequence of small intestine overstimulation through recurrent infections by enteric pathogens.	This project was funded by the Total Foundation, Institut Pasteur, Pasteur Foundation Switzerland, as well as the Nutricia Research Foundation.
52	Breastmilk, Stool, and Meconium: Bacterial Communities in South Africa	Wallenborn et al, 2022	Yes	No disease studied.	Mother-infant dyads (N=20) from a longitudinal birth cohort in the Vhembe district of Limpopo Province, South Africa.	South Africa	Rural	16S ribosomal RNA sequencing/ Illumina MiSeq platform	Observational pilot study	20	Stool samples	18–40 years	Not indicated in infants.	Black African	Aim: To describe the microbial diversity, identify distinct taxonomic units, and determine correlations between bacterial abundance in breastmilk and stool samples from mother-infant dyads in a geographic region and population that is vastly understudied.	None.	Despite the importance of breastmilk in seeding the infant gut microbiome, the authors found evidence of distinct bacterial communities between breastmilk and stool samples from South African mother-infant dyads.	This study was funded by the National Institute of Environmental Health Sciences.
95	Feeding-Related Gut Microbial Composition Associates With Peripheral T-Cell Activation and Mucosal Gene Expression in African Infants	Wood et al, 2018	Yes	No disease studied.	155 infants at Site B Clinic in Khayelitsha, Western Cape, South Africa.	South Africa	Urban	16S rRNA gene sequencing/ Illumina MiSeq platform	Prospective, longitudinal study	155	Stool samples	Not indicated.	Not indicated.	Not indicated.	Aim: To interrogate the mechanisms underlying the protective effect of exclusive breastfeeding.	None.	These data suggest that non-exclusive breastfeeding alters the gut microbiota, increasing T-cell activation and, potentially, mucosal recruitment of HIV target cells. Study findings highlight a biologically plausible mechanistic explanation for the reduced postnatal HIV transmission observed in EBF infants.	This work was supported by the National Institute of Child Health and Human Development, the National Institute of Environmental Health Sciences, and the National Science Foundation. Additional funding was provided by the University of Washington Center for AIDS Research, a National Institutes of Health (NIH)–funded program supported by the following NIH institutes and centers: National Institute…
55	The oral microbiome and breast cancer and nonmalignantbreast disease, and its relationship with the fecal microbiomein the Ghana Breast Health Study	Wu et al, 2022	Yes	Breast cancer and non-malignant breast disease. Disease is of public health signifcance.	881 women enrolled in the Ghana Breast Health Study, including 369 breast cancers, 93 non-malignant cases and 419 population-based control.	Ghana	Not indicated.	16S rRNA gene was sequence/ llumina MiSeq	Case-control study	881	Stool samples	Cases: 18-74 years	Women only.	Not indicated.	Aim: To investigate the associations of the oral microbiome with breast cancer and non-malignant breast disease in the Ghana Breast HealthStudy; and the relationship of the oral microbiome with the fecalmicrobiome.	None.	The study findings suggest that oral microbiome, similar to the fecal microbiome, is strongly and similarly associated with breast cancer and nonmalignant breast disease cross-sectionally. Multiple genera, specifically some periodontal pathogens, are inversely associated with breast cancer and nonmalignant breast disease. Additionally, the oral and fecal microbiome appear to be more correlated am…	This work was supported by the Intramural Research Program in theDivision of Cancer Epidemiology and Genetics, the US National Insti-tutes of Health (NIH), National Cancer Institute (NCI).
88	Stool microbiota composition is associated with the prospective risk of Plasmodium falciparum infection	Yooseph et al, 2015	Yes	Plasmodium falciparum infection/Malaria. Disease is of public health significance.	Malian children and adults in Mali in the rural village of Kalifabougou.	Mali	Rural	16S rRNA gene sequencing/ Illumina HiSeq 2000	Prospective cohort study	200	Stool samples	3 months- 25 years	106/94	Bambara is the predominant ethnic group.	Aim: To examine the relationship between the stool microbiota composition of individuals in this cohort and their prospective risk of both P. falciparum infection and febrile malaria.	None.	The findings of the study underscore the diversity of gut microbiota across geographic regions. The preliminary finding of an association between gut microbiota composition and P. falciparum infection risk suggests that strategic modulation of gut microbiota composition could decrease P. falciparum infection risk in malaria-endemic areas, potentially as an adjunct to partially effective malaria v…	This project was funded with federal funds from the National Institute of Allergy and Infectious Diseases, National Institutes of Health, Department of Health and Human Services. The cohort study in Mali was supported by the Division of Intramural Research, National Institute of Allergy and Infectious Diseases, National Institutes of Health.
1159	The seasonal changes of the gut microbiome of the population living in traditional lifestyles are represented by characteristic species-level and functional-level SNP enrichment patterns	Zhu et al, 2021	Yes	No disease studied.	40 Hadza fecal metagenome samples spanning three seasons.	Tanzania	Not indicated.	Whole metagenomic sequencing	Observational study	40	Stool samples	Not indicated.	Not indicated.	Not indicated.	Aim: To perform a strain-level single nucleotide polymorphism (SNP) analysis on 40 Hadza fecal metagenome samples spanning three seasons.	None.	Eight prevalent species have significant SNP enrichments with the increasing number of SNP, among which only Eubacterium biforme, Eubacterium hallii and Ruminococcus obeum have relatively high species abundances. Many genes in the microbiomes also presented characteristic SNP distributions between the wet season and the dry season. This implies that the seasonal changes might indirectly impact th…	This work was partially supported by National Science Foundation of China, Ministry of Science and Technology (High-Tech), and Sino-German Research Center.
1270	The effects of iron fortification on the gut microbiota in African children: a randomized controlled trial in Cote d’Ivoire	Zimmermann et al, 2010	Yes	No disease studied.	6–14y old school children in rural central Côte d'Ivoire with a high infectious disease burden.	Cote d'Ivoire	Rural	Quantitative real-time PCR	Randomized, double-blind, controlled trial	139	Stool samples	6–14 years	59/80	Not indicated.	Objective: To determine the effect of a poorly absorbed iron fortificant on gut microbiota, gut helminthes, and gut inflammation in African children in an area with high rates of diarrheal disease.	2 fortified biscuits (Midor AG, Meilen, Switzerland) [electrolytic Fe (A-131; Dr Lohmann GmbH, Emmerthal, Germany), 20 mg Fe/d per child].	Anemic African children carry an unfavorable ratio of fecal enterobacteria to bifidobacteria and lactobacilli, which is increased by iron fortification. Thus, iron fortification in this population produces a potentially more pathogenic gut microbiota profile, and this profile is associated with increased gut inflammation.	Not indicated.
